# Supplementary material
Source: ML conference proceedings conference paper supplement (https://openaccess.thecvf.com/content/CVPR2026/html/Cao_ArtiMuse_Fine-Grained_Image_CVPR_2026_paper.html)
Supplement: Supplementary file 1 [file Cao_ArtiMuse_Fine-Grained_Image_CVPR_2026_supplemental.pdf]

# ArtiMuse: Fine-Grained Image Aesthetics Assessment with Joint Scoring and Expert-Level Understanding

## Supplementary Material

### 1. Details of Annotation Workflow

#### 1.1. Annotation Personnel and Expertise

Over 30 annotators participated in the construction of the ArtiMuse-10K dataset. The team consists of experts, scholars, professional artists, designers, and graduate-level researchers with diverse backgrounds spanning media arts, curation, art history, calligraphy, traditional Chinese painting, photography, graphic design, product design, and computer science, as shown in Tab. 1.

The expert group includes senior professors with over 20–30 years of experience in art theory, aesthetics, color and emotion computation, design, and digital media; researchers with extensive experience in cultural studies, visual communication, and exhibition design; and professional artists specialized in photography, traditional ink painting, calligraphy, and cross-media creation. In addition, several doctoral and master’s researchers with interdisciplinary training in architecture, interactive media, artificial intelligence art, audiovisual performance, user experience, product design, and digital fabrication also contributed to the annotation. A dedicated subgroup with professional calligraphy training (undergraduate and postgraduate) provided domain-specific annotations for traditional calligraphy and ink-painting samples.

Together, this diverse team ensures that the dataset reflects a wide range of expert knowledge, visual literacy, and aesthetic sensibilities, enabling fine-grained perceptual-level annotation across heterogeneous image sources.

#### 1.2. Annotation Workflow

The annotation workflow follows a multi-stage pipeline designed to ensure high-quality, diverse, and reliable perceptual-level labels.

**1. Initial Sampling and Distribution Analysis.** We first conducted coarse-grained categorization and distribution diagnostics on the initial image pool. Several categories were found to contain insufficient samples or lacked variance in quality levels, indicating a need for data augmentation.

**2. Targeted Sample Augmentation.** To address underrepresented categories, we collected additional samples through (i) expert contributions, (ii) archival materials from relevant course activities, and (iii) targeted acquisition from online platforms and domain-specific communities. This ensured substantial diversity and discriminative variation across visual attributes.

**3. Secondary Cleaning and Fine-Grained Categorization.** The expanded dataset underwent a second round of manual cleaning and refinement. Images were reorganized to ensure clear attribute definitions and consistent taxonomy alignment across categories. Our taxonomy was co-developed with aesthetic experts and grounded in established art literature. Following *Nomenclature for Museum Cataloging* and Berger’s *Ways of Seeing*, we structured categories along physical and contextual dimensions and adopted an intent-based hierarchy to ensure mutual exclusivity, with main categories defined by medium and sub-categories by functional context.

We further drew on Jauss’s *Reception Aesthetics* to characterize emotional response and Arnheim’s *Gestalt theory* to support comprehensive evaluation. These foundations ensure that our multi-dimensional aesthetic taxonomy is both conceptually coherent and practically meaningful. For example, *Daily Photo* is distinguished from *Architecture* or *Movie Still* by the absence of expert staging and equipment, providing a clear production-based boundary. The observed category imbalance reflects ecological validity rather than artificial balancing, while *AIGC* and *General* follow established literature for broad-spectrum ontological coverage.

**4. Hybrid Assignment Strategy.** To balance domain expertise and cross-domain reliability, each image was assigned using a mixed evaluation procedure:

- **Expert-Matched Review:** Images within an annotator’s area of expertise were directly assigned to them, ensuring high-fidelity professional evaluation.
- **Cross-Domain Blind Review:** To mitigate bias from category familiarity, non-expert images were randomly assigned at the *individual image level* rather than in category-wise batches.

Each image received evaluations from at least four independent annotators, ensuring score robustness and cross-annotator consistency. Following professional standards, our multi-channel strategy filtered annotations with deviations  $> 4$  to ensure high-fidelity judgments, yielding substantial agreement (Cohen’s  $\kappa = 0.82$ ) and further validating the reliability of our annotation framework.

**5. Structured Data Collection.** We developed a customized annotation interface using `Node.js` and web-based forms. Each image was stored as an independent JSON record containing numerical ratings and textual comments. After collection, invalid entries were removed and dimension-wise scores were aggregated using predefined weights to compute the final weighted aesthetic score.



Table 2. Aesthetic attributes, weights, and descriptions of the ArtiMuse-10K dataset.

| No. | Attribute                   | Weight | Description                                                                                                                                                   |
|-----|-----------------------------|--------|---------------------------------------------------------------------------------------------------------------------------------------------------------------|
| 1   | Composition & Design        | 0.07   | Evaluate the balance, contrast, layout aesthetics, and rhythm of the composition. Focus on the use of dynamic focal points, unity, and harmony in the design. |
| 2   | Visual Elements & Structure | 0.07   | Analyze the interplay of color, geometry, spatial organization, and illumination to optimize visual contrast and structural clarity.                          |
| 3   | Technical Execution         | 0.08   | Examine the mastery of medium and materials, including brushstrokes, focus, exposure, light handling, as well as clarity and resolution of the image.         |
| 4   | Originality & Creativity    | 0.15   | Analyze the uniqueness of the concept and execution, focusing on how the work exceeds common styles with imagination and creative breakthroughs.              |
| 5   | Theme & Communication       | 0.15   | Evaluate the clarity of the subject and its communication. Consider how effectively the narrative, cultural significance, and societal context are conveyed.  |
| 6   | Emotion & Viewer Response   | 0.10   | Assess how well the work evokes an emotional response, engages the viewer, and creates lasting impressions with personal significance.                        |
| 7   | Overall Gestalt             | 0.38   | Evaluate the overall visual appeal and artistic impact of the image, considering how well the elements combine to create an engaging, meaningful impression.  |
| 8   | Comprehensive Evaluation    | –      | Provide a comprehensive aesthetics assessment of the image, evaluating its effectiveness in visual impact, theme communication, and artistic depth.           |
| –   | Overall Aesthetics Score    | –      | Overall aesthetics score derived from multi-dimensional evaluation.                                                                                           |

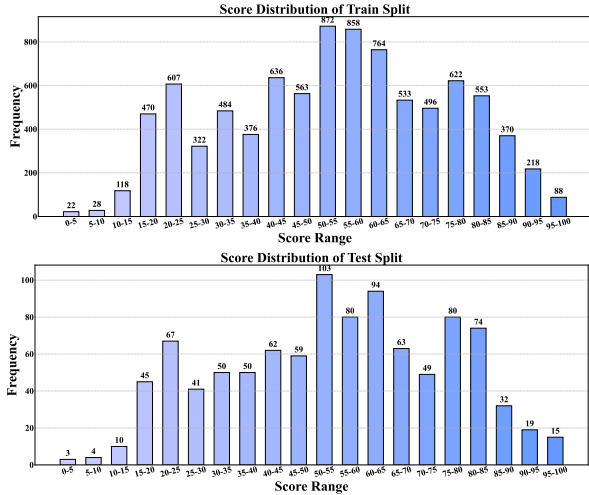

Figure 2. Score distribution of training and test splits in ArtiMuse-10K.

ArtiMuse-10K are sourced from diverse origins and encompass a total of 5 main categories and 15 subcategories. The detailed distribution of image counts across these categories is presented in Tab. 3.

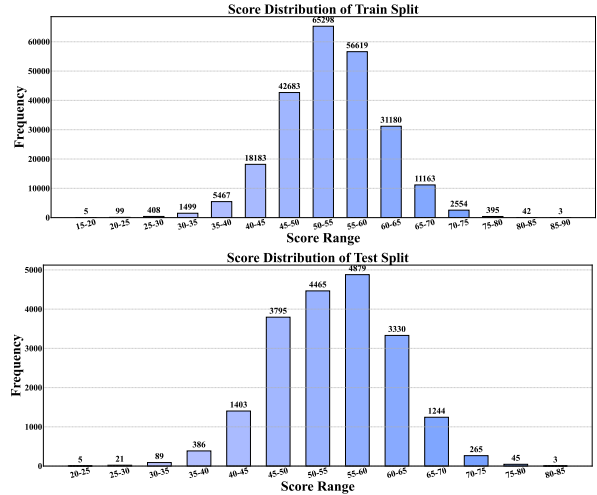

Figure 3. Score distribution of training and test splits in AVA.

### 3. Details of Public Dataset Collection & Processing

We select and sample a subset of high-quality aesthetic captions from existing public datasets, with particular emphasis on ensuring both aesthetic caption quality and diversity in

Table 3. Statistics of ArtiMuse-10K across main categories and subcategories.

| Main Category          | Subcategory         | Description                                           | # Image     |
|------------------------|---------------------|-------------------------------------------------------|-------------|
| Photography            | Daily Photo         | Casual photos capturing daily scenes                  | 3071        |
|                        | Photographic Art    | Photos with artistic processing                       | 758         |
|                        | Architecture        | Photos of buildings and structures                    | 119         |
|                        | Portrait            | Portrait photography                                  | 82          |
|                        | Movie still         | Screenshots from films or TV shows                    | 81          |
|                        | <b>Total</b>        | –                                                     | <b>4111</b> |
| Painting & Calligraphy | Digital Art         | Computer-aided digital paintings                      | 1314        |
|                        | Children’s Painting | Paintings created by children                         | 699         |
|                        | Chinese Painting    | Chinese ink wash paintings                            | 511         |
|                        | General Painting    | General paintings with diverse scopes                 | 485         |
|                        | Sketch              | Pencil/charcoal sketches                              | 43          |
|                        | Calligraphy         | Artistic handwriting and lettering                    | 43          |
| <b>Total</b>           | –                   | <b>3095</b>                                           |             |
| AIGC                   | AIGC                | AI-generated content (particularly generative models) | 1453        |
| <b>Total</b>           | –                   | <b>1453</b>                                           |             |
| 3D Design              | Product Design      | 3D model snapshots for products                       | 516         |
|                        | Sculpture           | Sculpting artwork snapshots                           | 307         |
|                        | <b>Total</b>        | –                                                     | <b>823</b>  |
| Graphic Design         | Graphic Design      | Posters/logos/visual designs                          | 518         |
| <b>Total</b>           | –                   | <b>518</b>                                            |             |
| <b>Total</b>           | –                   | <b>10000</b>                                          |             |

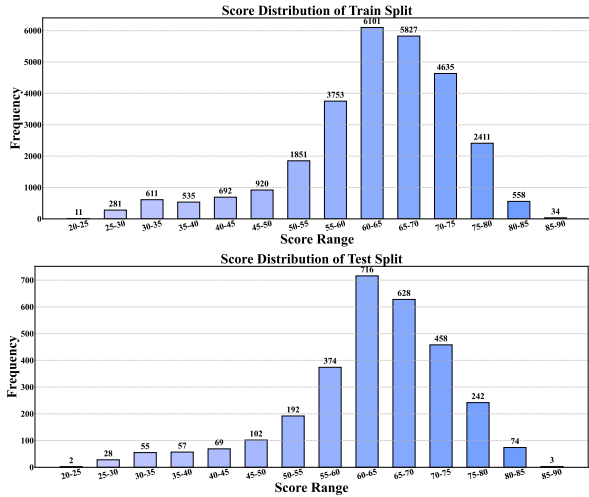

Figure 4. Score distribution of training and test splits in PARA.

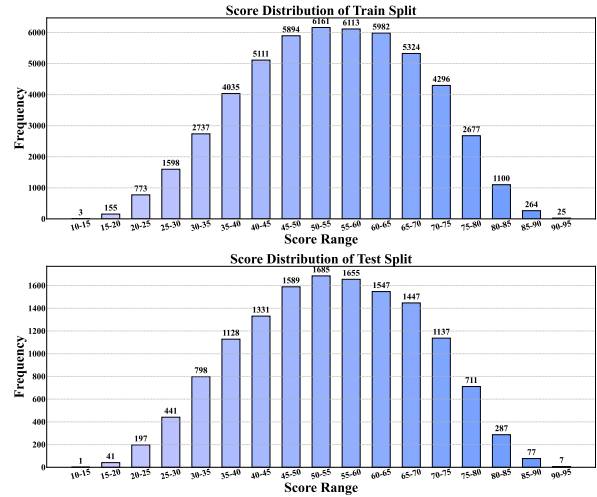

Figure 5. Score distribution of training and test splits in TAD66K.

the sampling process. The specific sampling statistics are presented in Tab. 4.

### 3.1. Datasets w/ Score Caption

AVA [16], TAD66K [8], PARA [21], FLICKR-AES [17]. For datasets containing only aesthetic scores without multi-dimensional annotations, we employ the scores as the primary guidance for MLLM to generate comprehensive image evaluations. The following prompt template is adopted:

#### Aesthetic Score Guidance Prompt

An expert panel award this picture a <score> score out of <range> for aesthetic quality. Provide a concise, step-by-step aesthetic analysis

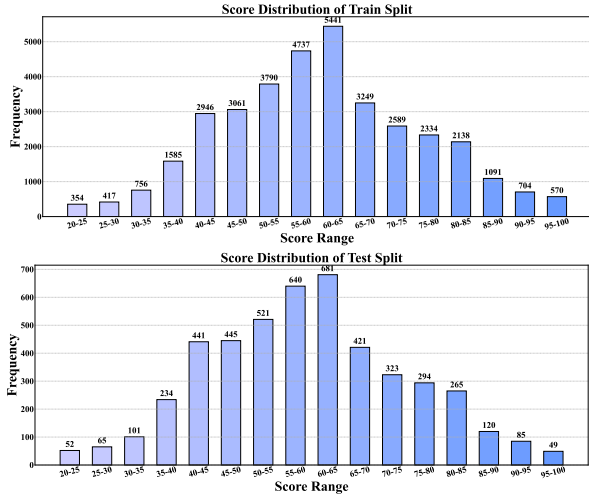

Figure 6. Score distribution of training and test splits in FLICKR-AES.

Table 4. Collection & processing results of public datasets.

| Public Dataset   | Dataset Type             | Sampled Size   |
|------------------|--------------------------|----------------|
| APDDv2 [10]      | w / partial text caption | 4,898          |
| SPAQ [5]         | w / partial text caption | 1,537          |
| KonIQ-10k [9]    | w / partial text caption | 1,488          |
| Impressions [12] | w / partial text caption | 1,443          |
| AVA [16]         | w / score caption        | 235,598        |
| TAD66K [8]       | w / score caption        | 52,248         |
| PARA [21]        | w / score caption        | 28,220         |
| FLICKR-AES [17]  | w / score caption        | 35,762         |
| <b>Total</b>     | —                        | <b>361,194</b> |

evaluating its strengths and weaknesses in Composition & Design, Visual Elements & Structure, Technical Execution, Originality & Creativity, Theme & Communication, Emotion & Viewer Response, Overall Gestalt and Comprehensive Evaluation.

Here, `<score>` and `<range>` represents the scores and their value ranges, extracted from the dataset with score caption, serve as quantitative indicators to guide the MLLM’s image analysis process.

### 3.2. Datasets w/ Partial Text Caption

**APDDv2 [10].** The APDDv2 dataset comprises 10,023 images, each annotated with multiple attributes, including: filename, Artistic Categories, Total aesthetic score, Theme and logic, Creativity, Layout and composition, Space and perspective, The sense of order, Light and shadow, Color, Details and texture, The overall, Mood, and Language Comment (the most critical attribute for our study). We filter out samples with excessively short or missing Language Com-

ment entries, retaining 4,898 valid instances. For the filtered data, we design a structured prompt template:

#### Prompt Template for APDDv2

```
For the above picture, the artist
gave the following evaluation:
<language_comment>. For other aesthetic
attributes:
This image has a artistic category of
<artistic_categories>.
The total aesthetic score is
<total_aesthetic_score> out of 100.
The score for theme and logic is
<theme_and_logic> out of 10.
The score for creativity is <creativity>
out of 10.
The score for layout and composition is
<layout_and_composition> out of 10.
The score for space and perspective is
<space_and_perspective> out of 10.
The score for sense of order is
<sense_of_order> out of 10.
The score for light and shadow is
<light_and_shadow> out of 10.
The score for color is <color> out of 10.
The score for details and texture is
<details_and_texture> out of 10.
The score for overall is <overall> out of
10.
The score for mood is <mood> out of 10.
Please combine the evaluation above
with the picture content, then evaluate
the aesthetic quality of this image
from the attribute of <attribute>.
<description>. Limit the assessment
to one paragraph (<=100 words), avoiding
markdown formatting. Answer in English.
Do not repeat contents in artist’s
evaluation (like scores).
```

which incorporates key information such as the overall comment, category labels, and subcategory scores to ensure comprehensive utilization of the available annotations. Here, words enclosed in angle brackets ( $i_i$ ) denote referenced phrases or statements. For instance, `<language_comment>`, `<artistic_categories>`, `<total_aesthetic_score>`, ..., and `<mood>` refer to the corresponding captions in the dataset, while `<attribute>` and `<description>` represent the specific attribute and its description listed in Tab. 2.

**SPAQ [5].** The original dataset contains various image attributes, including EXIF tags, mean opinion scores (MOS), image attribute scores, and scene category labels. The SPAQ dataset comprises 11,125 images, which we filter according to two key criteria: (1) 80% of the filtered subset must have either MOS (Mean Opinion Score) or the

average of four quality metrics (brightness, colorfulness, contrast, and sharpness) falling within the extreme ranges of [0, 25] or [75, 100], ensuring sufficient representation of both low and high aesthetic quality samples; (2) all selected images must contain valid entries for the "categories" attribute. From these, we select attributes relevant to visual aesthetics—specifically, MOS ratings and a subset of aesthetic-related attribute scores—and designed the following prompt template:

#### Prompt Template for SPAQ

```
The score for overall quality is <mos>
out of 100, with a high degree (if <mos>
> 75) / low degree (if <mos> < 25) of
aesthetic appeal.
The score for brightness is <brightness>
out of 100.
The score for colorfulness is
<colorfulness> out of 100.
The score for contrast is <contrast> out
of 100.
The score for sharpness is <sharpness>
out of 100.
The image content belongs to the
following categories: <categories>.
Please combine the evaluation above
with the picture content, then evaluate
the aesthetic quality of this image
from the attribute of <attribute>.
<description>. Limit the assessment
to one paragraph (<=100 words), avoiding
markdown formatting. Answer in English.
Do not repeat contents in artist's
evaluation (like scores).
```

Here, The classification into high-degree and low-degree categories is governed by the MOS threshold: instances with  $MOS > 75$  are designated as high-degree, while those with  $MOS < 25$  are categorized as low-degree. The placeholders  $\langle mos \rangle$ ,  $\langle brightness \rangle$ ,  $\langle colorfulness \rangle$ , ..., and  $\langle categories \rangle$  correspond to the respective captions from the SPAQ dataset, while  $\langle attribute \rangle$  and  $\langle description \rangle$  refer to the specific aesthetic attributes and their detailed descriptions as presented in Table 2.

**KonIQ-10K [9].** The KonIQ-10K dataset comprises 10,000 images, from which we select the following aesthetic-relevant attributes for filtering:  $MOSz$ , brightness, contrast, colorfulness, sharpness, and quality\_factor. Our filtering criteria requires that 80% of the selected images must have  $MOSz$  scores falling within either the [0, 25] or [75, 100] ranges, ensuring balanced representation of both low and high aesthetic quality samples. Through this process, we obtain 1,488 filtered images, which are then annotated by the MLLM using the following prompt template:

#### Prompt Template for KonIQ-10K

```
The score for overall quality is <MOSz>
out of 100, with a high degree (if <MOSz>
> 75) / low degree (if <MOSz> < 25) of
aesthetic appeal.
The score for brightness is <brightness>
out of 1.
The score for contrast is <contrast> out
of 1.
The score for colorfulness is
<colorfulness> out of 1.
The score for sharpness is <sharpness>
out of 100.
Please combine the evaluation above
with the picture content, then evaluate
the aesthetic quality of this image
from the attribute of <attribute>.
<description>. Limit the assessment
to one paragraph (<=100 words), avoiding
markdown formatting. Answer in English.
Do not repeat contents in artist's
evaluation (like scores).
```

Here, The classification into high-degree and low-degree categories is governed by the  $MOSz$  threshold: instances with  $MOSz > 75$  are designated as high-degree, while those with  $MOSz < 25$  are categorized as low-degree. The placeholders  $\langle MOSz \rangle$ ,  $\langle brightness \rangle$ ,  $\langle contrast \rangle$ , ..., and  $\langle sharpness \rangle$  correspond to the respective captions from the KonIQ-10K dataset, while  $\langle attribute \rangle$  and  $\langle description \rangle$  refer to the specific aesthetic attributes and their detailed descriptions as presented in Table 2.

**Impressions [12].** The original dataset contains over 1,400 images, each accompanied by multiple annotations (including image descriptions, impressions, and aesthetic evaluations) from different annotators, resulting in more than 4,800 data entries in total. Along with these annotations, Impressions also collects detailed annotator metadata such as educational background and aesthetic experience. To ensure annotation quality, we apply the following filtering criterion: for each image, we retain only the evaluation from the most aesthetically experienced annotator. This filtering process yields a refined dataset of 1,443 high-quality annotations, which are then annotated by the MLLM using the following prompt template:

#### Prompt Template for Impressions

```
This image's caption is: <caption>.
What is happening in the image:
<image_description>.
The emotions/thoughts/beliefs
that the photograph may inspire:
<image_impression>.
```

```

The aesthetic elements that
elicited the expressed impression:
<image_aesthetic_eval>.
Please combine the evaluation above
with the picture content, then evaluate
the aesthetic quality of this image
from the attribute of <attribute>.
<description>. Limit the assessment
to one paragraph (<=100 words), avoiding
markdown formatting. Answer in English.
Do not repeat contents in artist's
evaluation (like scores).

```

Here, the placeholders `<caption>`, `<image_description>`, `<image_impression>`, and `<image_aesthetic_eval>` correspond to the respective captions from the Impressions dataset, while `<attribute>` and `<description>` refer to the specific aesthetic attributes and their detailed descriptions as presented in Table 2.

## 4. Details of Token As Score Strategy

We conducted a comprehensive comparison of various score prediction strategies, and the experimental results are presented in Tab. 7. Across all experiments, the prediction score methodology was the sole differentiating factor, while the training data, training configurations, and model architecture remained consistent. To ensure robust and reliable experimental conclusions, we conduct comprehensive evaluations on both AVA (the largest image aesthetics scoring dataset) [16] and ArtiMuse-10K (ours).

### 4.1. Level As Score

Following Q-Align [20], we predict scores by predicting five distinct discrete levels. Specifically, during training, we convert the continuous scores in the dataset into corresponding levels based on a predefined mapping and train the model to predict these discrete levels. This mapping scheme involves uniformly dividing the range between the maximum score ( $M$ ) and the minimum score ( $m$ ) into five distinct intervals, with scores within each interval being assigned to a corresponding discrete level:

$$L(s) = l_i \text{ if } m + \frac{i-1}{5} \times (M-m) < s \leq m + \frac{i}{5} \times (M-m) \quad (1)$$

where

$$\{l_i\}_{i=1}^5 = \{\text{bad, poor, fair, good, excellent}\} \quad (2)$$

which are the standard text rating levels as defined by ITU [3]. During inference, the final score prediction was derived by computing a weighted sum of the predicted probability distribution across these five levels.

**Discussions.** The comparison between Exp. (a) and (i) in Tab. 7, along with other experimental groups, demonstrates that the Level As Score approach exhibits a significant performance degradation compared to the Token As Score. This decline can be attributed to the overly coarse-grained level partitioning scheme, which fails to achieve fine-grained score mapping. Furthermore, the adopted vocabulary lacks proper alignment with the LLM’s lexical table design, collectively contributing to the suboptimal outcomes.

### 4.2. Token As Score w/ Expanding Tokens

We provide a detailed exposition of the *Token As Score* strategy, as referenced in the Sec.4.3 of the main paper. In this investigation, we explore the expansion of the LLM vocabulary by incorporating additional tokens specifically for aesthetics score prediction. For instance, in the “Expanding 25 Tokens” configuration, we augment the vocabulary with the following tokens: `[AES_SCORE_TOKEN_0]`, `[AES_SCORE_TOKEN_1]`, `[AES_SCORE_TOKEN_2]`, ..., `[AES_SCORE_TOKEN_25]`. These tokens correspond to predicted scores of 0, 4, 8, ..., 100, respectively. The model is trained to predict these specialized tokens, and during inference, the final aesthetic score is derived by computing a weighted sum based on the predicted probability distribution over these tokens.

**Discussions.** A comparison of experiments (b)-(f) on AVA reveals that the performance of the Token As Score strategy initially improves and then declines as the number of introduced tokens increases, peaking at 100 tokens. This trend occurs because an insufficient number of tokens fails to establish an accurate token-score mapping, while an excessive number exceeds the available data or model capacity, leading to underfitting. Experimental results on ArtiMuse-10K demonstrate that the Token As Score approach with expanding tokens performs poorly, suggesting this method fails to converge properly when either the dataset is inherently challenging or insufficient in size.

### 4.3. Token As Score w/ Existing Tokens

We further explore the selection of a subset of the LLM’s existing displayable tokens for aesthetics score prediction. Our selection criteria prioritize brevity, inherent order, ease of convergence during training, and minimal ambiguity with numerical scores. As illustrated in Tab. 7, our specific configurations in experiments are as follows:

**Existing 25 Tokens.** We select the tokens `a, b, c, ... , y`, which are sequentially mapped to scores ranging from 0 to 100 with an interval of 4 (i.e., 0, 4, 8, ..., 100).

**Existing 50 Tokens.** We select the tokens `a, b, c, ... , y, A, B, C, ... , Y`, which are sequentially mapped to scores ranging from 0 to 100 with an interval of 2 (i.e., 0, 2, 4, ..., 100).

**Existing 100 Tokens (non-ordered).** We select the first 100 character tokens starting from 0 within the vocabulary of the Qwen2.5-7B LLM, as detailed in Tab. 5. These tokens are sequentially mapped to scores from 0 to 100.

**Existing 100 Tokens (ordered).** This represents the final approach adopted in ArtiMuse. We construct 100 tokens by concatenating lowercase letters, ensuring these tokens are ordered within the vocabulary of the Qwen2.5-7B LLM, as presented in Tab. 6. These tokens are sequentially mapped to scores from 0 to 100.

**Discussions.** The comparisons in (b)-(g), (c)-(h), and (d)-(j) demonstrate that when using the same number of tokens for prediction in the Token As Score, tokens from the existing vocabulary consistently yield better performance. This occurs because newly introduced tokens lack corresponding prior knowledge from the model’s pretraining phase and do not possess inherent ordinal relationships with scores, making them less effective than tokens in the LLM vocabulary that carry clear semantic information and sequential relationships.

Furthermore, experiments (g), (h), and (j) reveal that when using existing tokens for Token As Score, model performance improves significantly as the number of tokens increases. Due to the limited number of displayable characters in the Qwen2.5-7B LLM vocabulary, we are currently unable to further increase this quantity, which will be explored in future work. Additionally, comparing (i) and (j) shows that the choice of tokens also affects performance—the token mapping scheme in (j), which has more explicit semantic and ordinal relationships, leads to better results.

## 5. Implementation Details

### 5.1. Training Details

**Hyperparameters.** We employ the InternVL-3-8B [26] model as our base model and adopt its default hyperparameters for the aesthetic assessment task through two training stages: Text Pretrain and Score Finetune. The pre-trained models and specific hyperparameter configurations are detailed in Table 8, with modifications carefully designed to address the unique requirements of visual aesthetic evaluation.

**Resolution Strategy.** The original InternVL-3 model employs a dynamic high-resolution strategy [26] to handle images of varying resolutions and attribute ratios. This approach involves three key steps: closest attribute ratio matching, image resizing and splitting, and optional thumbnail generation. Given an input image with dimensions  $W \times H$ , the aspect ratio  $r = W/H$  is computed. The algorithm selects a target aspect ratio  $r_{\text{best}}$  from a predefined set  $\mathcal{R}$ , which minimizes distortion while constraining the number of tiles  $n_{\text{tiles}}$  within a range  $[n_{\text{min}}, n_{\text{max}}]$ . The im-

age is resized to dimensions  $S \times i_{\text{best}} \times S \times j_{\text{best}}$  (where  $S = 448$ ) and split into  $n_{\text{tiles}} = i_{\text{best}} \times j_{\text{best}}$  tiles of size  $S \times S$ . If  $n_{\text{tiles}} > 1$ , a thumbnail of size  $S \times S$  is appended to preserve a global view.

However, in ArtiMuse, we adopt a fixed-resolution strategy instead of the dynamic approach. Aesthetic evaluation relies heavily on holistic image features, such as composition, color harmony, and spatial relationships, which can be disrupted by splitting an image into localized tiles. The dynamic strategy’s tile-based processing risks fragmenting these global characteristics, thereby degrading performance in tasks requiring an integrated understanding of visual aesthetics. By resizing all images to a uniform resolution without tiling, we preserve the structural and semantic coherence of the entire image. This adjustment ensures that the model captures aesthetic qualities through a consistent, undistorted representation of the input, aligning better with the requirements of fine-grained aesthetic analysis. Our experiments demonstrate that employing the fixed-resolution strategy yields approximately 0.3 improvements in both SRCC and PLCC metrics for aesthetic scoring tasks compared to the dynamic high-resolution strategy, while simultaneously more than doubling training and inference efficiency.

### 5.2. Inference Details for Aesthetics Scoring

We present the implementation details for various models in the aesthetic scoring task. Note that certain models—including TANet [8], AesMamba [6], UNIAA-LLaVA [25], and Next Token Is Enough [13]—are excluded from this discussion due to testing constraints.

**Models w/ Scoring Ability.** For models capable of generating aesthetic scores (Q-Instruct [19], PEAS [24], Q-Align [20]), we directly utilize their scoring outputs. In cases where a model provides only general assessments (MUSIQ [11]), we adopt its general score as the final evaluation result.

**Models w/o Scoring Ability.** For models lacking inherent scoring capabilities (VILA [14], mPLUG-Owl2 [22], ShareGPT-4V [4], Qwen-2.5-VL-7B [2], InternVL3-8B [26]), we employ carefully designed prompts to elicit numerical evaluations. The prompt structure is as follows:

#### Prompts for Models without Scoring Ability

```
Please rate the aesthetic quality of
this image and provide a score between
0 and 100, where 0 represents the lowest
quality and 100 represents the highest.
Your response should contain only an
integer value.
```

This prompt guides the model to output an integer score from 0 to 100, aligning with ArtiMuse’s scoring format. We

Table 5. Token-score mapping table for existing 100 tokens (non-ordered).

|                 |    |    |    |    |    |     |     |     |     |     |     |     |     |     |     |     |     |     |     |     |     |
|-----------------|----|----|----|----|----|-----|-----|-----|-----|-----|-----|-----|-----|-----|-----|-----|-----|-----|-----|-----|-----|
| <b>Token ID</b> | 15 | 16 | 17 | 18 | 19 | 20  | 21  | 22  | 23  | 24  | 25  | 26  | 27  | 28  | 29  | 30  | 31  | 32  | 33  | 34  |     |
| <b>Token</b>    | 0  | 1  | 2  | 3  | 4  | 5   | 6   | 7   | 8   | 9   | :   | ;   | <   | =   | >   | ?   | @   | A   | B   | C   |     |
| <b>Score</b>    | 0  | 1  | 2  | 3  | 4  | 5   | 6   | 7   | 8   | 9   | 10  | 11  | 12  | 13  | 14  | 15  | 16  | 17  | 18  | 19  |     |
| <b>Token ID</b> | 35 | 36 | 37 | 38 | 39 | 40  | 41  | 42  | 43  | 44  | 45  | 46  | 47  | 48  | 49  | 50  | 51  | 52  | 53  | 54  |     |
| <b>Token</b>    | D  | E  | F  | G  | H  | I   | J   | K   | L   | M   | N   | O   | P   | Q   | R   | S   | T   | U   | V   | W   |     |
| <b>Score</b>    | 20 | 21 | 22 | 23 | 24 | 25  | 26  | 27  | 28  | 29  | 30  | 31  | 32  | 33  | 34  | 35  | 36  | 37  | 38  | 39  |     |
| <b>Token ID</b> | 55 | 56 | 57 | 58 | 59 | 60  | 61  | 62  | 63  | 64  | 65  | 66  | 67  | 68  | 69  | 70  | 71  | 72  | 73  | 74  |     |
| <b>Token</b>    | X  | Y  | Z  | [  | \  | ]   | ^   | -   | `   | a   | b   | c   | d   | e   | f   | g   | h   | i   | j   | k   |     |
| <b>Score</b>    | 40 | 41 | 42 | 43 | 44 | 45  | 46  | 47  | 48  | 49  | 50  | 51  | 52  | 53  | 54  | 55  | 56  | 57  | 58  | 59  |     |
| <b>Token ID</b> | 75 | 76 | 77 | 78 | 79 | 80  | 81  | 82  | 83  | 84  | 85  | 86  | 87  | 88  | 89  | 90  | 91  | 92  | 93  | 94  |     |
| <b>Token</b>    | l  | m  | n  | o  | p  | q   | r   | s   | t   | u   | v   | w   | x   | y   | z   | {   |     | —   | }   | ~   | i   |
| <b>Score</b>    | 60 | 61 | 62 | 63 | 64 | 65  | 66  | 67  | 68  | 69  | 70  | 71  | 72  | 73  | 74  | 75  | 76  | 77  | 78  | 79  |     |
| <b>Token ID</b> | 95 | 96 | 97 | 98 | 99 | 100 | 101 | 102 | 103 | 104 | 105 | 106 | 107 | 108 | 109 | 110 | 111 | 112 | 113 | 114 | 115 |
| <b>Token</b>    | ç  | £  | ¤  | ¥  | ¦  | §   | ¨   | ©   | ª   | «   | ¬   | ®   | ¯   | °   | ±   | ²   | ³   | ´   | µ   | ¶   | ·   |
| <b>Score</b>    | 80 | 81 | 82 | 83 | 84 | 85  | 86  | 87  | 88  | 89  | 90  | 91  | 92  | 93  | 94  | 95  | 96  | 97  | 98  | 99  | 100 |

Table 6. Token-score mapping table for existing 100 tokens (ordered), which is used in ArtiMuse.

|              |    |    |    |    |    |    |    |    |    |    |    |    |    |    |    |    |    |    |    |    |     |
|--------------|----|----|----|----|----|----|----|----|----|----|----|----|----|----|----|----|----|----|----|----|-----|
| <b>Token</b> | aa | ab | ac | ad | ae | af | ag | ah | ai | aj | ak | al | am | an | ao | ap | aq | ar | as | at |     |
| <b>Score</b> | 0  | 1  | 2  | 3  | 4  | 5  | 6  | 7  | 8  | 9  | 10 | 11 | 12 | 13 | 14 | 15 | 16 | 17 | 18 | 19 |     |
| <b>Token</b> | au | av | aw | ax | ay | az | ca | cb | cc | cd | ce | cf | cg | ch | ci | cj | ck | cl | cm | cn |     |
| <b>Score</b> | 20 | 21 | 22 | 23 | 24 | 25 | 26 | 27 | 28 | 29 | 30 | 31 | 32 | 33 | 34 | 35 | 36 | 37 | 38 | 39 |     |
| <b>Token</b> | co | cp | cq | cr | cs | ct | cu | cv | cw | cx | cy | da | db | dc | dd | de | df | dg | dh | di |     |
| <b>Score</b> | 40 | 41 | 42 | 43 | 44 | 45 | 46 | 47 | 48 | 49 | 50 | 51 | 52 | 53 | 54 | 55 | 56 | 57 | 58 | 59 |     |
| <b>Token</b> | dj | dk | dl | dm | dn | do | dp | dq | dr | ds | dt | du | dv | dw | dx | dy | ea | eb | ec | ed |     |
| <b>Score</b> | 60 | 61 | 62 | 63 | 64 | 65 | 66 | 67 | 68 | 69 | 70 | 71 | 72 | 73 | 74 | 75 | 76 | 77 | 78 | 79 |     |
| <b>Token</b> | ee | ef | eg | eh | ei | ej | ek | el | em | en | eo | ep | eq | er | es | et | eu | ev | ew | ex | ey  |
| <b>Score</b> | 80 | 81 | 82 | 83 | 84 | 85 | 86 | 87 | 88 | 89 | 90 | 91 | 92 | 93 | 94 | 95 | 96 | 97 | 98 | 99 | 100 |

Table 7. Explorations on score prediction strategies. To ensure experimental validity, we conduct our experiments both on the AVA dataset and AriMuse-10K dataset. (j) represents the setting of Token As Score strategy in ArtiMuse. Beyond the convergence issues observed with the expanding strategy on ArtiMuse-10K, the 100-token configuration demonstrates peak performance across various token quantities.

| Exp. | Score Prediction                  | AVA [16]     |              | ArtiMuse-10K |              |
|------|-----------------------------------|--------------|--------------|--------------|--------------|
|      |                                   | SRCC         | PLCC         | SRCC         | PLCC         |
| (a)  | 5 Levels                          | 0.820        | 0.818        | 0.571        | 0.551        |
| (b)  | Expanding 25 Tokens               | 0.803        | 0.665        | 0.045        | 0.055        |
| (c)  | Expanding 50 Tokens               | 0.822        | 0.821        | 0.018        | 0.027        |
| (d)  | Expanding 100 Tokens              | 0.824        | 0.822        | 0.029        | 0.027        |
| (e)  | Expanding 250 Tokens              | 0.823        | 0.821        | -0.012       | 0.002        |
| (f)  | Expanding 500 Tokens              | 0.821        | 0.819        | 0.006        | 0.012        |
| (g)  | Existing 25 Tokens                | 0.823        | 0.822        | 0.006        | 0.010        |
| (h)  | Existing 50 Tokens                | 0.825        | 0.824        | 0.612        | 0.623        |
| (i)  | Existing 100 Tokens (non-ordered) | 0.826        | 0.825        | 0.582        | 0.541        |
| (j)  | Existing 100 Tokens (ordered)     | <b>0.827</b> | <b>0.826</b> | <b>0.614</b> | <b>0.627</b> |

use these prompted scores for comparative analysis, ensuring consistency across all evaluated models.

Table 8. Pre-trained models and hyperparameters used for ArtiMuse, including text pretraining and score finetuning.

| Pre-trained models / Hyperparameters | Text Pretrain             | Score Finetune            |
|--------------------------------------|---------------------------|---------------------------|
| Vision Encoder                       | InternViT-300M-448px-V2.5 | InternViT-300M-448px-V2.5 |
| Large Language Model                 | Qwen2.5-7B                | Qwen2.5-7B                |
| Large Language Model LoRA Rank       | 16                        | 128                       |
| Image Resolution                     | 448 × 448                 | 448 × 448                 |
| Max Sequence Length                  | 8192                      | 8192                      |
| Batch Size                           | 128                       | 128                       |
| Warmup Epochs                        | 0.03                      | 0.03                      |
| Gradient Accumulation                | 1                         | 1                         |
| Numerical Precision                  | Float16                   | Float16                   |
| LR Schedule                          | Cosine decay              | Cosine decay              |
| LR Max                               | 4e-5                      | 2e-5                      |
| Weight Decay                         | 0.05                      | 0                         |
| Epoch                                | 1                         | 2                         |

### 5.3. Inference Details for Textual Analysis

When evaluating the model’s textual analysis capability, we design specialized prompts for comparative models by incorporating relevant aesthetic background knowledge to ensure fairness. Specifically, for ArtiMuse, we employ the following prompt format during testing:

### Prompts for ArtiMuse

Please evaluate the aesthetic quality of this image from the attribute of `<attribute>`.

where `<attribute>` represents the specific attribute listed in Tab. 2. For other models, we augment their inputs with corresponding attribute descriptions to maintain parity in contextual understanding:

### Prompts for Other Models

Background Knowledge: `<attribute>`: `<description>`. Please evaluate the aesthetic quality of this image from the attribute of `<attribute>`. No more than 100 words.

where `<attribute>` and `<description>` represent the specific attribute and its description listed in Tab. 2. Additional textual evaluation results and analysis are presented in Section 6.5.

## 5.4. Comparison Details

**Judging by MLLM.** We provide a detailed explanation of the methodology employed in Sec. 5.2 of the main paper for using MLLMs to select among different models’ structural aesthetic analysis results. Following LLM-as-a-Judge [7], LLM-Eval [15], and DepictQA [23], we leverage MLLMs to build an efficient and validated pipeline for robust assessment (Sec. 5.4, Supp.). As illustrated in Fig. 7, we first determine the input image and the corresponding aesthetic attributes, then guide the MLLM to generate textual evaluations using the following prompt template:

### Prompts for Generating Textual Evaluation

You are an aesthetic evaluation expert. Please evaluate the aesthetic quality of this image from the attribute of `<attribute>`. No more than 100 words.

where `<attribute>` corresponds to the specific aesthetic attributes listed in Tab. 2. For human experts, we also provide the attribute and invite them to provide textual evaluations. The image, attribute, expert evaluations, and the outputs from different models are then fed into a judgment MLLM (specifically, Gemini-2.0-flash) for assessment. We guide this MLLM to evaluate and select the highest-quality responses among the model outputs using a single-choice question format prompt (Taking 4 models as an example):

### MLLM-as-Judge Prompts

You are an expert aesthetic evaluation judge. Your task is to evaluate the aesthetic analysis quality of each model’s response, based on its alignment with the given human expert critique. There are four model-generated responses: model1, model2, model3, and model4. Assess them independently for clarity, accuracy, insightfulness, and relevance, and identify the single best response overall. Output only the identifier of the best model (i.e., one of: model1, model2, model3, model4) | do not include any extra text, explanation, symbols, or formatting.

which minimizes hallucinations, provides sufficient information for decision-making, and ensures consistent evaluation criteria across all model responses, thereby yielding relatively accurate and stable selection outcomes. The results is presented in Tab.2 of the main paper.

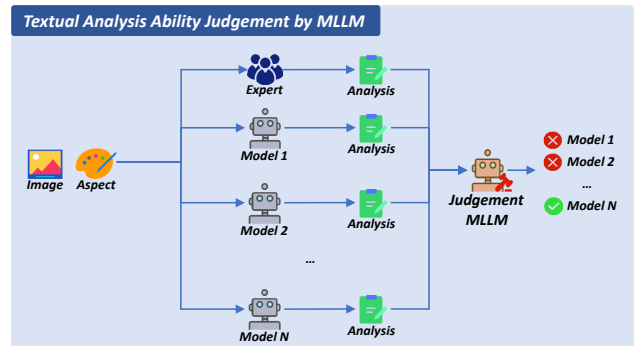

Figure 7. Pipeline of the structural aesthetic analysis ability judgement by MLLM.

**Judging by Human.** For the user study, we randomly select 20 images from the ArtiMuse-10K test set, ensuring coverage across different categories and varying aesthetic qualities. Each image is evaluated by different models across 8 aesthetic attributes, with their outputs recorded. We compile these results into 20 multiple-choice questions, where each question corresponds to one image and the model-generated evaluations for a specific attribute, supplemented by a detailed description of that attribute for context. We recruit 20 volunteers, including both individuals without formal training and those with extensive aesthetic evaluation experience, to participate in the study. Their selections are collected, and the preference rates for each model are computed. The results are presented in Tab.2 of the main paper.

Table 9. More comparison on aesthetics scoring. The best and second-best performances are highlighted in red and blue, respectively. ArtiMuse demonstrates superior performance when compared to various state-of-the-art open-source & closed-source MLLMs.

| Model                                                             | AVA [16]     |              | PARA [21]    |              | TAD66K [8]   |              | FLICKR-AES [17] |              | ArtiMuse-10K |              |
|-------------------------------------------------------------------|--------------|--------------|--------------|--------------|--------------|--------------|-----------------|--------------|--------------|--------------|
|                                                                   | SRCC         | PLCC         | SRCC         | PLCC         | SRCC         | PLCC         | SRCC            | PLCC         | SRCC         | PLCC         |
| <i>Comparison with SOTA Open-Source &amp; Closed-Source MLLMs</i> |              |              |              |              |              |              |                 |              |              |              |
| Qwen-2.5-VL-72B-instruct [2]                                      | 0.408        | 0.387        | <b>0.727</b> | <b>0.763</b> | 0.232        | 0.235        | 0.626           | 0.589        | 0.233        | 0.197        |
| InternVL3-78B [26]                                                | 0.385        | 0.344        | 0.666        | 0.694        | 0.221        | 0.220        | 0.518           | 0.433        | 0.223        | 0.206        |
| GPT-4o [1]                                                        | <b>0.509</b> | <b>0.485</b> | 0.697        | 0.744        | 0.278        | 0.282        | 0.605           | 0.597        | <b>0.333</b> | <b>0.276</b> |
| Gemini-2.0-flash [18]                                             | 0.474        | 0.457        | 0.703        | 0.704        | <b>0.319</b> | <b>0.323</b> | <b>0.658</b>    | <b>0.651</b> | 0.286        | 0.265        |
| <b>ArtiMuse (Ours)</b>                                            | <b>0.827</b> | <b>0.826</b> | <b>0.936</b> | <b>0.958</b> | <b>0.510</b> | <b>0.543</b> | <b>0.814</b>    | <b>0.837</b> | <b>0.614</b> | <b>0.627</b> |

Table 10. Further comparison of generalization ability. The best performances are highlighted in red. \* Results are trained only on single dataset to compare the generalization ability. ArtiMuse demonstrates strong generalization capabilities when compared to state-of-the-art IAA models.

| Model                                               | AVA [16]     |              | PARA [21]    |              | TAD66K [8]   |              | FLICKR-AES [17] |              | ArtiMuse-10K |              |
|-----------------------------------------------------|--------------|--------------|--------------|--------------|--------------|--------------|-----------------|--------------|--------------|--------------|
|                                                     | SRCC         | PLCC         | SRCC         | PLCC         | SRCC         | PLCC         | SRCC            | PLCC         | SRCC         | PLCC         |
| <i>Further Comparison of Generalization Ability</i> |              |              |              |              |              |              |                 |              |              |              |
| Q-Align (AVA) *                                     | 0.822        | 0.817        | 0.694        | 0.711        | 0.417        | 0.445        | 0.643           | 0.664        | 0.337        | 0.320        |
| <b>ArtiMuse (AVA) *</b>                             | <b>0.827</b> | <b>0.826</b> | <b>0.697</b> | <b>0.725</b> | <b>0.419</b> | <b>0.451</b> | <b>0.647</b>    | <b>0.676</b> | <b>0.395</b> | <b>0.376</b> |
| Q-Align (PARA) *                                    | 0.492        | 0.456        | 0.913        | 0.888        | 0.300        | 0.281        | 0.913           | 0.888        | 0.158        | 0.115        |
| <b>ArtiMuse (PARA) *</b>                            | <b>0.493</b> | <b>0.510</b> | <b>0.936</b> | <b>0.958</b> | <b>0.301</b> | <b>0.311</b> | <b>0.936</b>    | <b>0.958</b> | <b>0.229</b> | <b>0.188</b> |
| Q-Align (TAD66K) *                                  | <b>0.695</b> | <b>0.699</b> | 0.688        | 0.667        | 0.501        | 0.531        | 0.688           | 0.667        | 0.317        | 0.304        |
| <b>ArtiMuse (TAD66K) *</b>                          | <b>0.671</b> | <b>0.676</b> | <b>0.719</b> | <b>0.677</b> | <b>0.510</b> | <b>0.543</b> | <b>0.719</b>    | <b>0.677</b> | <b>0.397</b> | <b>0.369</b> |
| Q-Align (FLICKR-AES) *                              | <b>0.609</b> | <b>0.611</b> | 0.836        | 0.839        | 0.366        | 0.376        | 0.798           | 0.818        | 0.215        | 0.208        |
| <b>ArtiMuse (FLICKR-AES) *</b>                      | <b>0.581</b> | <b>0.594</b> | <b>0.854</b> | <b>0.874</b> | <b>0.379</b> | <b>0.397</b> | <b>0.814</b>    | <b>0.837</b> | <b>0.294</b> | <b>0.285</b> |
| Q-Align (ArtiMuse-10K) *                            | <b>0.398</b> | <b>0.386</b> | 0.346        | 0.395        | 0.194        | 0.197        | 0.137           | 0.123        | 0.551        | 0.573        |
| <b>ArtiMuse (ArtiMuse-10K) *</b>                    | <b>0.397</b> | <b>0.385</b> | <b>0.446</b> | <b>0.461</b> | <b>0.230</b> | <b>0.232</b> | <b>0.349</b>    | <b>0.334</b> | <b>0.614</b> | <b>0.627</b> |

## 6. More Results

### 6.1. Comparison with SOTA Open-Source & Closed-Source MLLMs

We benchmark ArtiMuse against state-of-the-art multimodal large language models (MLLMs), including both open-source (Qwen-2.5-VL-72B-instruct [2] and InternVL3-78B [26]) and closed-source models (GPT-4o [1] and Gemini-2.0-Flash [18]). As shown in Tab. 9, closed-source models generally outperform open-source models. Notably, ArtiMuse achieves significantly higher performance in aesthetics scoring than these leading MLLMs despite having only 8B parameters, demonstrating its exceptional capability in image aesthetic assessment.

### 6.2. Further Comparison of Generalization Ability

We further experimentally validate ArtiMuse’s generalization ability through comprehensive cross-dataset evaluations. As shown in Tab. 10, we train both the state-of-the-art open-source IAA model Q-Align [20] and ArtiMuse on AVA [16], PARA [21], TAD66K [8], FLICKR-

AES [17], and ArtiMuse-10K, then evaluate them across all five datasets. The results demonstrate that ArtiMuse consistently outperforms Q-Align on unseen datasets in most cases, confirming its superior generalization capability.

### 6.3. Image Examples in ArtiMuse-10K

As illustrated in Fig. 9, Fig. 10 and Fig. 11, the ArtiMuse-10K dataset includes a diverse collection of images, meticulously organized across all specified subcategories. The dataset encompasses a wide range of aesthetic qualities and sources, ensuring rich variability and broad representativeness.

### 6.4. Complete Examples in ArtiMuse-10K

In ArtiMuse-10K, professional experts meticulously evaluate each image across eight aesthetic attributes, providing detailed textual assessments along with an overall aesthetics score. Here, we present the complete data examples from each main categories in the dataset, including Photography, Painting & Calligraphy, AIGC, 3D Design and Graphic Design, as shown in Fig. 13, Fig. 14, Fig. 15, Fig. 16, Fig. 17,

Fig. 18, and Fig. 19.

### 6.5. Further Comparison of Textual Analysis

We provide comprehensive examples of ArtiMuse’s structural aesthetic analysis on images, accompanied by expert commentary and comparative evaluations with other models, as illustrated in Fig. 20, Fig. 21, and Fig. 22. All images used in this analysis are sourced from the ArtiMuse-10K test set.

### 6.6. Failure Cases

Although ArtiMuse demonstrates strong performance across benchmarks, it still exhibits limitations and leaves meaningful room for improvement. To provide a balanced and rigorous analysis, Fig. 8 presents one accurate case (error 1.0) alongside representative failure cases with varying error levels (2.8 and 6.3).

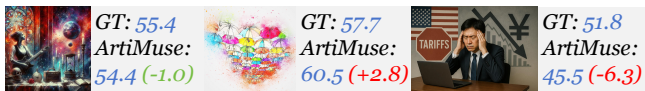

Figure 8. Failure cases of ArtiMuse.

### 6.7. Results on Real-world Images

To evaluate ArtiMuse’s capability in processing out-of-distribution images, we employed real-world images for testing. As demonstrated in Fig. 23, Fig. 24 and Fig. 25, our model maintains accurate and expert-level analysis even when handling real-world scenarios. The results showcase ArtiMuse’s ability to provide professional aesthetic assessments, systematically identifying both strengths and weaknesses based on detailed visual characteristics.

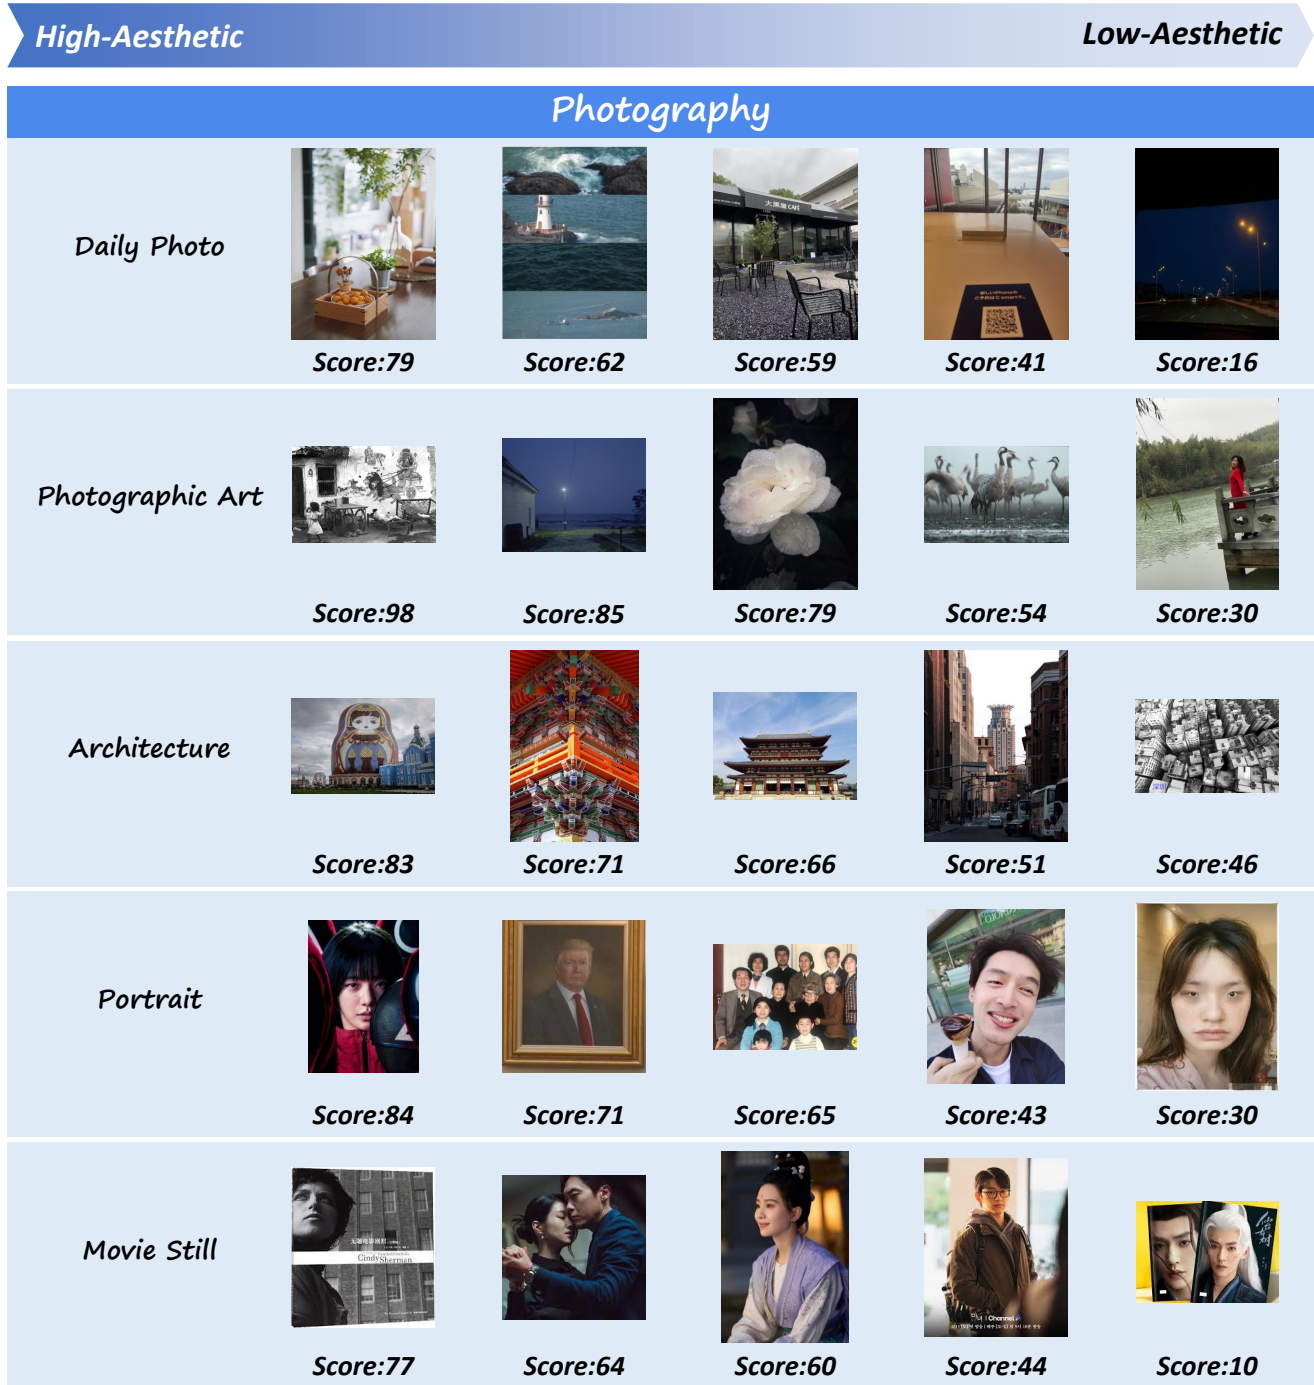

Figure 9. Image examples from the *Photography* category in ArtiMuse-10K dataset.

High-Aesthetic

Low-Aesthetic

Painting & Calligraphy

Digital Art

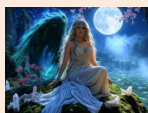

Score:84

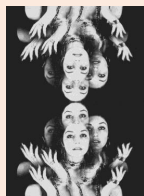

Score:79

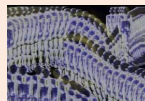

Score:70

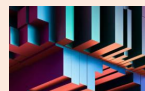

Score:60

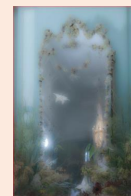

Score:0

Children's Painting

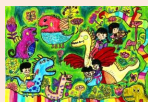

Score:82

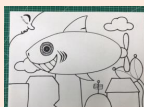

Score:76

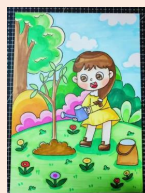

Score:69

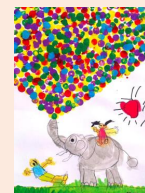

Score:48

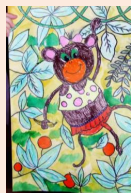

Score:39

Chinese Painting

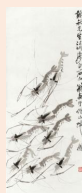

Score:100

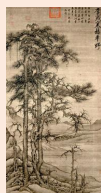

Score:95

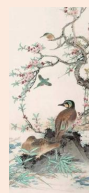

Score:79

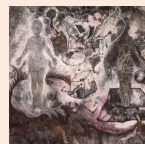

Score:64

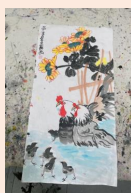

Score:36

General Painting

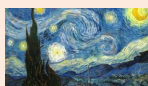

Score:99

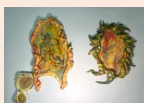

Score:72

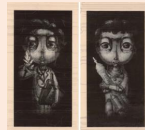

Score:67

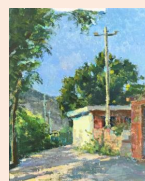

Score:51

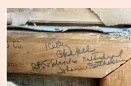

Score:15

Sketch

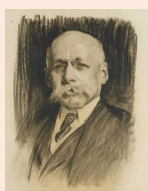

Score:84

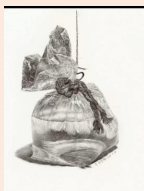

Score:66

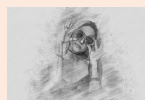

Score:51

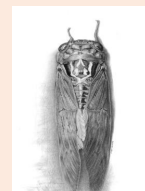

Score:40

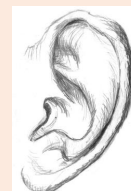

Score:19

Calligraphy

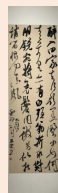

Score:82

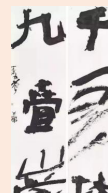

Score:77

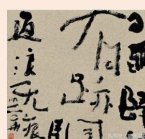

Score:73

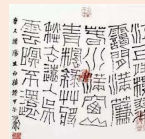

Score:60

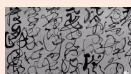

Score:19

Figure 10. Image examples from the *Painting & Calligraphy* category in ArtiMuse-10K dataset.

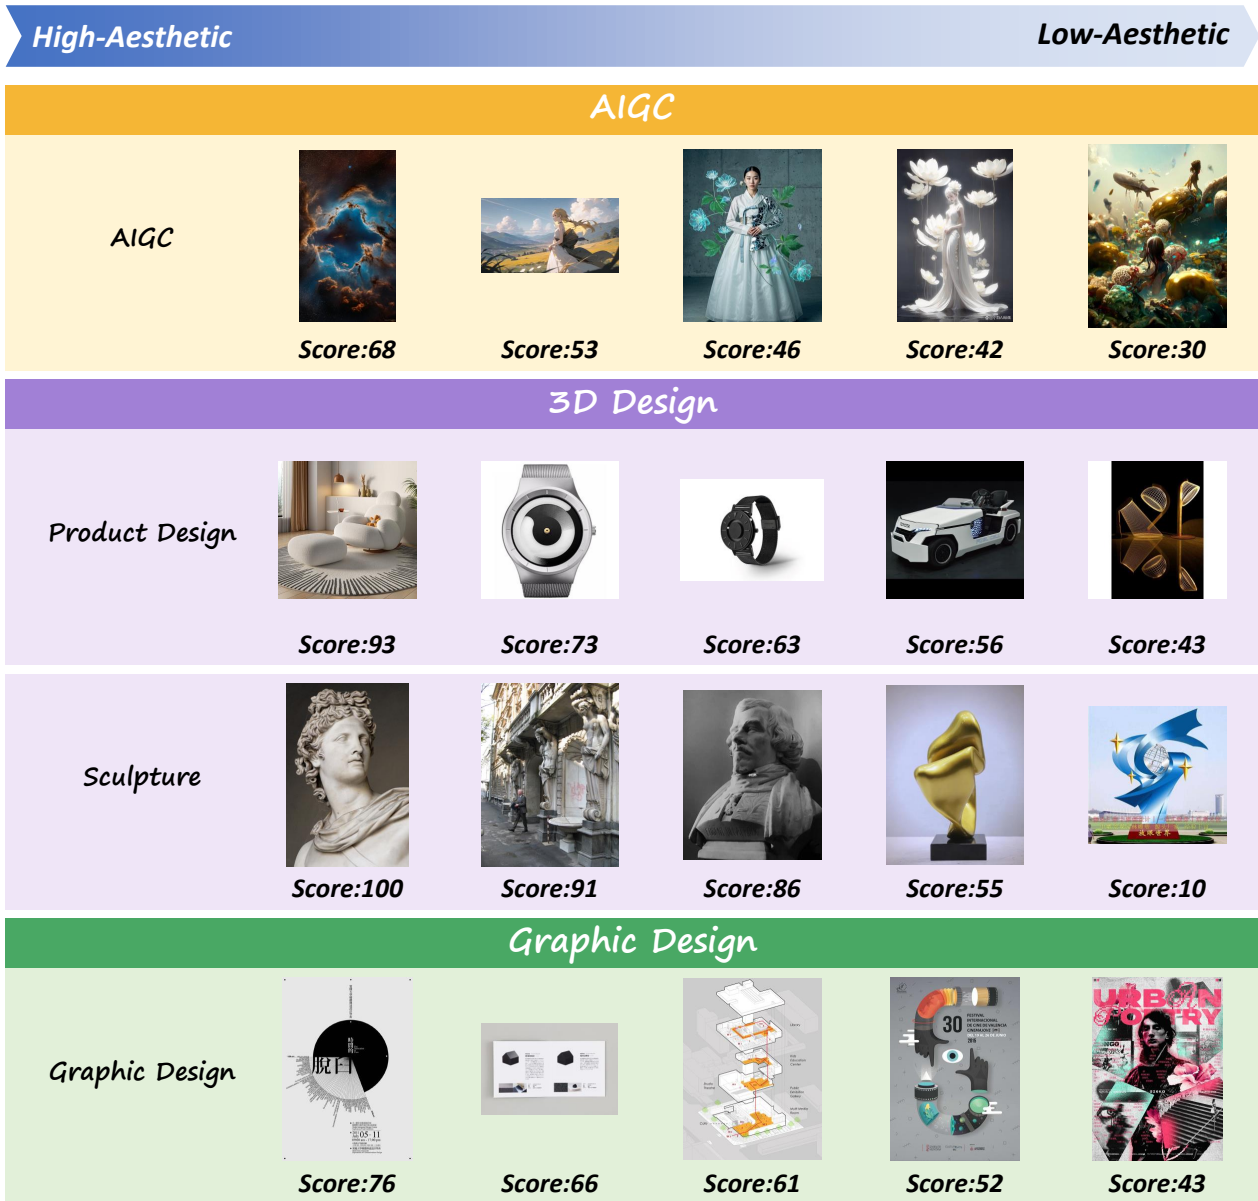

Figure 11. Image examples from the AIGC, 3D Design and Graphic Design categories in ArtiMuse-10K dataset.

## High-aesthetic Example

## Photography

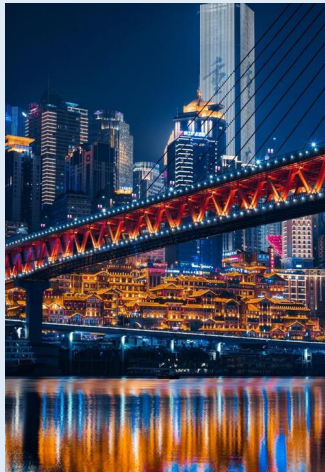

**Overall Aesthetics Score: 83**

### **1.Composition & Design:**

*The composition is standard and effective. The diagonal line of the bridge is used to guide the line of sight. The bridge in the foreground, the traditional buildings in the middle and the modern high-rise buildings in the background are cleverly organized together, forming a rich sense of layering and depth. The reflection on the water surface increases the balance and rhythm of the picture.*

### **2.Visual Elements & Structure:**

*The colors are vivid and contrasting. The warm building lights and the cold night sky and water reflections form a visual impact. The lines and shapes are clear and powerful. The juxtaposition of different architectural styles highlights the characteristics and sense of space of the city.*

### **3.Technical Execution:**

*The exposure is properly controlled, and the rich details of the bright and dark parts are successfully captured in the night scene environment. The focus is accurate, the main body is clear and sharp, and the reflection on the water surface is also well handled. The overall picture quality and detail expression are good.*

### **4.Originality & Creativity:**

*The theme is a common urban night scene. Although the composition and expression techniques are mature, there is no obvious innovative or experimental breakthrough in concept or execution. It is a common and excellent capture of such scenes.*

### **5.Theme & Communication:**

*The theme is clear, vividly conveying the city's unique magical three-dimensional sense and the fusion of the old and the new, and the vibrant night scene. It effectively tells the city's visual story through light and shadow and architectural features.*

### **6.Emotion & Viewer Response:**

*The picture creates a bright, prosperous and vibrant atmosphere, which can effectively arouse the curiosity and admiration of the viewer, making people feel the unique charm of the city and leaving a deeper impression.*

### **7.Overall Gestalt:**

*The overall look is very shocking and attractive, the picture is colorful, rich in details, and clearly layered, and multiple visual elements are harmoniously integrated. The artistry and beauty are outstanding, giving people a complete visual enjoyment, fully showing the charm of the night scene.*

### **8.Comprehensive Evaluation:**

*The photo is highly complete, with standard composition and a sense of hierarchy. The use of colors and visual composition are attractive, the technical execution is solid, and the unique theme and atmosphere of the city are effectively conveyed. The overall visual effect is strong. It is a city landscape photography work with both artistry and beauty.*

Figure 12. High-aesthetic example from *Photography* category.

## Medium-aesthetic Example

## Photography

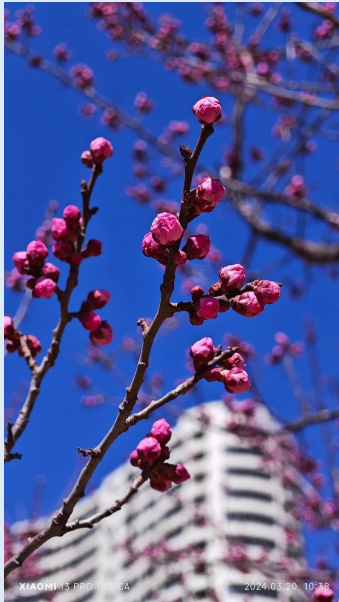

Overall Aesthetics Score: 52

### 1. Composition & Design:

Standard composition, using a close-up approach to highlight the plum blossom buds in the foreground, with the background blurred through depth of field. The foreground branches and buds are evenly distributed, but the blurred buildings in the background are slightly distracting, making the overall layout somewhat crowded and lacking stronger visual guiding lines or contrasting elements.

### 2. Visual Elements & Structure:

Vivid color contrast, with the pink buds and blue sky creating a strong visual impact that is quite attractive. The lines of the branches provide a skeletal structure, while the round shapes of the buds add softness. However, the blurred forms in the background feel somewhat disconnected from the sharp details in the foreground.

### 3. Technical Execution:

Technically standard execution. The focus is accurately placed on the foreground buds, achieving a good depth-of-field blur effect. The exposure is appropriate, preserving the vibrant colors of the buds and the purity of the blue sky. Details are acceptable in the focused area, but the blurred background shows noticeable fuzziness.

### 4. Originality & Creativity:

Moderate originality. Close-ups of plum or cherry blossoms are common photography subjects, and the use of depth-of-field blur for the background is also a conventional technique. The inclusion of urban buildings in the background adds a slight contrast between city and nature, but the overall concept and execution do not stand out beyond typical styles.

### 5. Theme & Communication:

The theme is clear, primarily showcasing the budding plum blossoms of spring, conveying vitality, hope, and seasonal change. The narrative is weak, focusing mainly on static beauty. It effectively communicates the essence of spring.

### 6. Emotion & Viewer Response:

Moderate emotional evocation. It allows viewers to sense the beauty and hope of spring but does not elicit deeper emotional resonance. Viewer engagement is average, mostly limited to visual appreciation, lacking a more lasting impression or personally meaningful trigger.

### 7. Overall Gestalt:

The overall impression is decent. The colors and foreground subject are relatively appealing, offering some aesthetic value. As a photographic work, its artistic quality is moderate. The blurred buildings in the background slightly disrupt the harmony, failing to create a stronger or more unique visual impact.

### 8. Comprehensive Evaluation:

Moderate completeness. The close-up composition clearly defines the subject, but the background treatment is less than ideal, diminishing the overall purity. The vibrant colors are a highlight, and the technical execution aligns with mobile photography standards. Creativity lacks uniqueness, and while the theme is clearly communicated, the emotional depth is insufficient. Overall, this is an ordinary yet somewhat visually pleasing spring photography piece.

## Low-aesthetic Example

## Photography

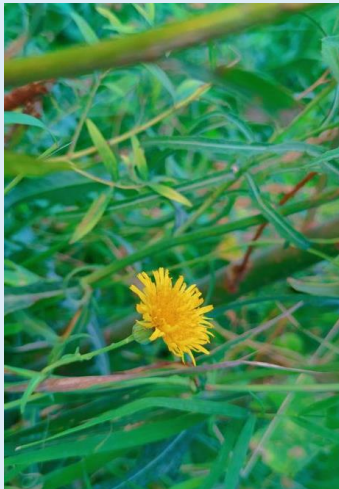

Overall Aesthetics Score: 13

### 1. Composition & Design:

The composition lacks clear guidance and focus, the main flower is disturbed by the surrounding messy branches and leaves, the background is too busy, the overall layout seems casual, and no effective visual balance or sense of rhythm is formed.

### 2. Visual Elements & Structure:

The color is mainly green, and the yellow flowers provide contrast, but the green part appears to be highly saturated and lacks layering. The lines are mainly messy grass leaves, and no organized or beautiful form and space relationship is formed.

### 3. Technical Execution:

There are obvious deficiencies in technical execution. The picture is not focused, the main flower appears blurred, and although the background is somewhat blurred, the overall clarity is low. The exposure is basically appropriate but fails to make up for the lack of focus.

### 4. Originality & Creativity:

The originality is low. The scene of shooting a small flower is very common. There is no unique creativity or imagination in the perspective, expression method or concept. It belongs to the common casual shooting.

### 5. Theme & Communication:

The theme is clearly about photographing flowers, conveying the presence of small flowers in the natural environment. The narrative or deeper meaning is limited, mainly staying on the surface of the visual presentation.

### 6. Emotion & Viewer Response:

The picture creates a bright, prosperous and vibrant atmosphere, which can effectively arouse the curiosity and admiration of the viewer, making people feel the unique charm of the city and leaving a deeper impression.

### 7. Overall Gestalt:

The emotional arousal is weak, and it is difficult to arouse strong resonance or deep thinking from the viewer. The viewer's participation is not high, the picture lacks fascinating details or artistic conception, and it is difficult to form a lasting impression.

### 8. Comprehensive Evaluation:

The overall look is not good, the picture appears messy and lacks clarity, the artistry is low, and the appeal is insufficient. Technical defects seriously affect the overall visual experience.

Figure 13. Medium-aesthetic example and low-aesthetic example from *Photography* category.

## High-aesthetic Example

## Painting & Calligraphy

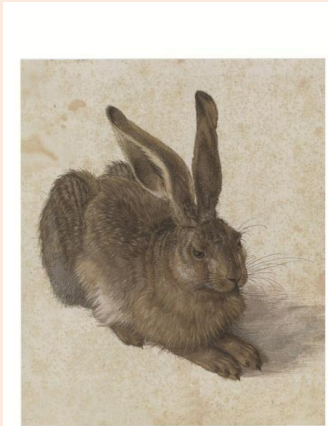

**Overall Aesthetics Score: 95**

### 1. Composition & Design:

The composition is standard, placing the main rabbit to the left of the center of the picture, leaving appropriate space, the overall layout is balanced and stable, and the shape arrangement is natural and sculptural.

### 2. Visual Elements & Structure:

The color is delicately used, and the texture and three-dimensional sense of the rabbit's fur are expressed through the layered changes of brown and gray. The lines are precisely outlined, the shape is captured vividly, and the expression of light and shadow and volume is outstanding.

### 3. Technical Execution:

The mastery of media materials is outstanding. Whether it is the detailed depiction of hair texture or the treatment of details such as eyes and claws, it shows unparalleled techniques and in-depth understanding of nature, and profound realistic skills.

### 4. Originality & Creativity:

Although it is a realistic depiction of animals, such a delicate, accurate and vital naturalistic depiction is highly original and groundbreaking in the context of the times in which it is located, showing a unique observation perspective and experimentality.

### 5. Theme & Communication:

The theme is clear, effectively conveying the rabbit's vivid posture and delicate physiological characteristics, with a certain narrative, showing the artist's awe of nature and meticulous observation.

### 6. Emotion & Viewer Response:

It can arouse the viewer's curiosity and closeness to natural life. The rabbit's eyes and posture are contagious, which arouses attention and appreciation of details, leaving a deep and lasting impression.

### 7. Overall Gestalt:

The overall look is extremely outstanding, with extremely high aesthetics and artistry. It is a model of realistic painting. The overall impression is harmonious and fascinating, showing outstanding artistic achievements.

### 8. Comprehensive Evaluation:

The work is highly complete, with a solid and balanced composition, rich visual elements and exquisite processing, and superb technical execution, showing excellent realism and in-depth observation of nature. The theme is clear, effectively conveying the beauty of life, which can arouse the viewer's emotional resonance and admiration for artistic skills. The overall artistry is extremely high, and it is an outstanding example of naturalistic depiction with important historical and artistic value.

## Medium-aesthetic Example

## Painting & Calligraphy

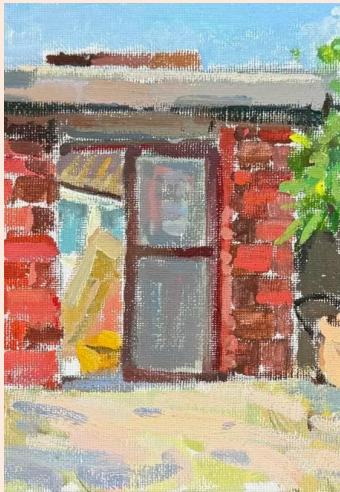

**Overall Aesthetics Score: 51**

### 1. Composition & Design:

The composition is standard, with a relatively centered approach, the building as the main body, and walls and plants on both sides, forming a basic balance. The layout is direct and easy to understand, without complex spatial processing, and the focus is on the building facade and its doorway area.

### 2. Visual Elements & Structure:

The use of color is relatively direct, the warm color of the red bricks contrasts with the green of the plants, and the blue sky and white clouds also create a sense of outdoor light. The lines and shapes are relatively simplified, with a strong sense of brushstrokes, and the form and space expression are relatively flat, but the basic outline is clear.

### 3. Technical Execution:

The mastery of media materials is reflected in the use of brushstrokes, with a strong sense of pigment stacking, showing a simple texture. The details are relatively general, focusing on capturing the overall impression rather than detailed depiction, showing a certain degree of painting directness.

### 4. Originality & Creativity:

The originality and creativity are common. The theme is an ordinary rural building scene, and the painting style is also a relatively direct and simple expression method, without obvious uniqueness or experimental attempts.

### 5. Theme & Communication:

The theme is clear and clearly conveys the image of an ordinary building and its surroundings. The communication is effective, and the viewer can directly recognize the content of the picture, showing a life-like scene.

### 6. Emotion & Viewer Response:

The emotional arousal is relatively bland, and the viewer may feel a simple and peaceful atmosphere, but not strong emotions. The viewer participation and lasting impression of the work are relatively ordinary, relying on the viewer's personal association.

### 7. Overall Gestalt:

The overall look is simple and natural, the color combination is harmonious and has a certain visual impact. The beauty is reflected in its simple depiction and the brushstrokes of the painting. The artistry belongs to the basic realistic or impressionistic style, with a certain ornamental value and medium appeal.

### 8. Comprehensive Evaluation:

The completeness is average, the composition is direct and balanced, the color application is relatively bright, and the technical execution is simple and has a sense of brushstrokes. The theme is clearly conveyed and effective, but the originality and creativity are common, and the emotional arousal and viewer response are relatively bland. The overall beauty and appreciation are simple, and it is a painting that sincerely depicts the scenery in front of the eyes.

Figure 14. High-aesthetic and medium-aesthetic example from *Painting & Calligraphy* category.

## Low-aesthetic Example

## Painting & Calligraphy

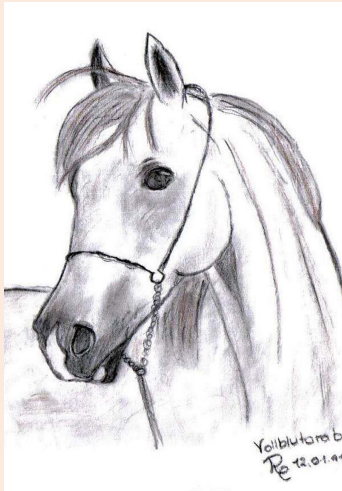

**Overall Aesthetics Score: 21**

### 1. Composition & Design:

The composition is relatively centered, with the main body being the horse's head and part of the shoulder and neck, leaving a lot of white space. The sense of balance is average, lacking significant guide lines or classic composition techniques to enhance the formal beauty of the picture.

### 2. Visual Elements & Structure:

The use of colors and lines is basic, and the form and sense of space are attempted to be expressed through simple line outlines and shadows, but the structural understanding and three-dimensional expression of the horse are insufficient.

### 3. Technical Execution:

The mastery of media materials is preliminary, the brushstrokes are somewhat immature, the shadow processing is not delicate and systematic, and there are obvious traces of smearing. The depiction of details, such as the eyes, nose and bit, is limited in expression.

### 4. Originality & Creativity:

The theme is a common subject in painting practice. The expression technique is also relatively traditional, lacking unique perspectives, concepts or experimental attempts.

### 5. Theme & Communication:

The theme is clear, and it is a portrait of a horse. The general form of the horse is conveyed, but the horse's spirit or richer story is not deeply expressed.

### 6. Emotion & Viewer Response:

The emotional arousal is weak, and the work is more of a basic modeling depiction, which is difficult to arouse strong resonance or lasting impression from the viewer. The viewer's participation may remain at a simple cognition of its techniques and forms.

### 7. Overall Gestalt:

The overall look is like a practice, and the artistry and appeal are relatively bland. The various elements are combined to form a recognizable image of a horse, but lack a deeper overall beauty and artistic tension. The original image is hand-painted, and there is no distortion of facts or physical reality.

### 8. Comprehensive Evaluation:

The completeness is average and the composition is regular. The visual elements and technical execution levels show basic abilities, but the details and the expression of volume and structure need to be strengthened. The creativity and theme are relatively plain, and the emotional resonance is insufficient. Overall, this is a basic modeling exercise.

## High-aesthetic Example

## AIGC

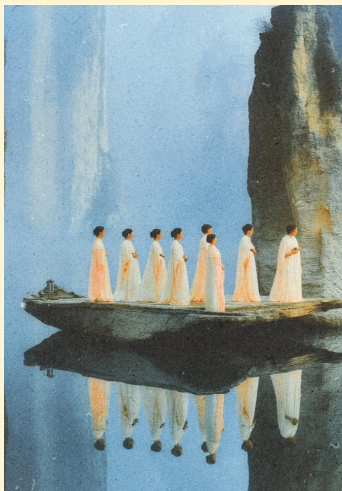

**Overall Aesthetics Score: 78**

### 1. Composition & Design:

The composition is standard and balanced, using vertical rocks as a frame, and the horizontal queue of people and the reflection of the water surface form a contrast and visual guidance. The overall layout is stable but not lacking in layering. The rhythm is reflected through the repeated figures, and the focus is on the marching team on the platform.

### 2. Visual Elements & Structure:

The color is soft and unified, mainly low-saturation blue-gray tones. The warm tones of the characters' clothes are the highlights of the picture. The lines are smooth and the shapes are simple. The sense of space is reflected through the blurring of the near-field rocks and the distant view, and the overall visual composition is harmonious.

### 3. Technical Execution:

The overall rendering effect of the AI-generated image is good, and the texture simulation increases the sense of art, but the details of the characters are slightly blurred and lack fineness. Although the reflection processing is effective, it is slightly stiff at the junction with the main body. The overall technical execution has reached a certain level.

### 4. Originality & Creativity:

Originality is reflected in the combination of oriental artistic conception and fantasy elements. The concept of characters moving forward on a suspended platform has a certain imagination, and the style is unique and beyond the common style, bringing a novel visual experience to the viewer.

### 5. Theme & Communication:

The theme is clear, and it seems to convey a mood about journey, exploration or spiritual pursuit. It has a certain narrative, which triggers the viewer's association with the story behind the picture, and effectively creates a mysterious and solemn atmosphere.

### 6. Emotion & Viewer Response:

The picture successfully evokes tranquil, mysterious or slightly melancholy emotions, inviting the viewer to enter this surreal scene, which has a certain appeal. Although the character's face is blurred, his posture and environment together create a thought-provoking artistic conception.

### 7. Overall Gestalt:

The overall look and feel has a high aesthetic and artistic quality, a unified and attractive style, and although it is generated by AIGC, there is no obvious unreasonableness or distortion, and it successfully creates a complete fantasy world with oriental charm.

### 8. Comprehensive Evaluation:

The completeness is high, the composition uses frame and horizontal line processing, the visual elements are harmonious in color, although the technical execution can be improved in details, but the original concept and theme are well conveyed, the emotion is successfully aroused, and the overall artistic style and appeal are unique, with a strong sense of artistic conception.

Figure 15. Low-aesthetic example from *Painting & Calligraphy* category and high-aesthetic example from *AIGC* category.

## Medium-aesthetic Example

AIGC

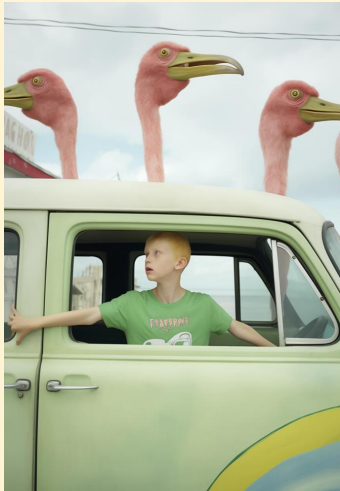

Overall Aesthetics Score: 62

### 1. Composition & Design:

The composition uses the contrast between the people and vehicles in the foreground and the huge flamingo in the background to guide the eye. The neck of the flamingo forms repeated lines, which brings a certain sense of rhythm. The focus is on the child's expression. Although the overall layout serves the concept of surrealism, it does not use particularly innovative or classic composition techniques.

### 2. Visual Elements & Structure:

The colors are soft and contrasting, and the pink flamingo, green car and light background are harmoniously matched to create a dreamy feeling. The form of objects, such as the soft feathers of the flamingo and the hard lines of the car, form a visual contrast. The treatment of scale and space is exaggerated and impactful, serving the surreal theme.

### 3. Technical Execution:

The details and textures of the image rendering are well performed, especially the texture of the flamingo feathers. The light and shadow effects are also relatively natural. However, the combination of some elements and some details of the characters still reveal traces of AI generation, which is not completely seamless.

### 4. Originality & Creativity:

The surreal combination of a giant flamingo and a child in a car is very unique and imaginative, jumping out of common themes and forms of expression, showing a high level of creativity.

### 5. Theme & Communication:

The theme is clear and conveys a sense of fantasy, surrealism, or childhood imagination. The child's curious expression enhances the narrative of the picture and effectively triggers the viewer's thinking and interpretation.

### 6. Emotion & Viewer Response:

The picture can effectively evoke the viewer's curiosity, surprise and other emotions, which is impressive. Its unusual scene easily attracts the viewer to participate in the interpretation and may inspire the viewer's personal associations about dreams, imagination or surrealism.

### 7. Overall Gestalt:

The overall look is unique and visually impactful, and the artistry is reflected in the presentation of its surreal concept. Although the concept is attractive and the execution is relatively perfect, certain characteristics inherent in AI-generated images and the significant distortion of physical reality affect its overall beauty and artistic height evaluation under this scoring system.

### 8. Comprehensive Evaluation:

This artwork excels in originality and imaginative concept, effectively conveying its surreal theme through unique visual elements and harmonious colors. While the composition is well-crafted, the execution shows some AI traces, though not overly distracting. The piece sparks viewer curiosity with its distinctive visual impact, though its artistic depth is somewhat limited by medium constraints and exaggerated distortions of reality.

## Low-aesthetic Example

AIGC

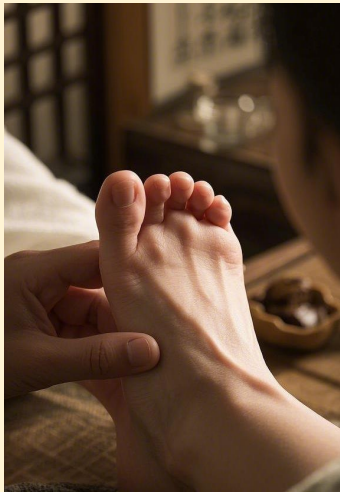

Overall Aesthetics Score: 32

### 1. Composition & Design:

Poor composition, close-up cropping appears cramped, the subject's feet are slightly to the left, the background on the right is blurred and contains some difficult-to-identify elements, resulting in a lack of balance and overall beauty in the picture.

### 2. Visual Elements & Structure:

The color is dull, with brown as the main tone, lacking freshness and layering. The lines and shapes are mainly concentrated on the feet, but the overall details are not sharp enough, the sense of shape is limited, and the sense of space is relatively flat.

### 3. Technical Execution:

Poor technical execution, blurred details and lack of clarity, especially the texture of the feet and the details of the fingers are not handled well, presenting a low-quality visual effect overall.

### 4. Originality & Creativity:

The originality is not high, the theme and expression are relatively common, it is a common foot close-up in medical or health care images, and there is no unique perspective or expression method to enhance creativity.

### 5. Theme & Communication:

The theme is clear, effectively conveying the scenes and behaviors of massage, and the viewer can clearly understand that the image content is about foot care or massage.

### 6. Emotion & Viewer Response:

The emotional arousal is limited, the picture fails to fully show the feelings of the experiencer or the concentration of the masseur, lacks emotional elements that can resonate or engage the viewer, and the overall feeling is bland.

### 7. Overall Gestalt:

The overall impression is mediocre, and there are deficiencies in all aspects. Although the theme is clear, the defects in composition, technology and emotional expression weaken its appeal as a work of art or high-quality image.

### 8. Comprehensive Evaluation:

The completeness is average, the composition is cramped, the technical execution needs to be strengthened, and the picture lacks clarity and details. The visual elements are bland and the emotional arousal is insufficient. The theme is clearly conveyed, but the overall originality and artistic appeal are lacking.

Figure 16. Medium-aesthetic example and low-aesthetic example from AIGC category.

## High-aesthetic Example

## 3D Design

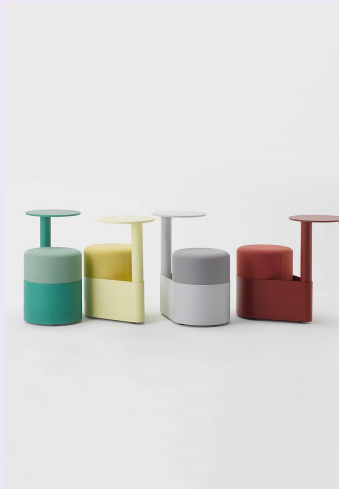

Overall Aesthetics Score: 92

### 1. Composition & Design:

The composition standard creates a visual sense of rhythm and contrast by presenting products of different colors and shapes side by side, balancing the elements of the picture, with a prominent main body and clear layout, guiding the viewer's eyes to browse the unique design of each product.

### 2. Visual Elements & Structure:

The use of color is the highlight of the work. The bright and harmonious color combination enhances the attractiveness of the product. The lines and shapes are simple and smooth, effectively constructing the modern form of the product. The relationship between form and space is properly handled, and the main body appears three-dimensional and prominent against a clean background.

### 3. Technical Execution:

The technical execution is excellent, the focus is accurate, the product details are clear, the exposure is even and accurately restores the color and texture of the product, the lighting is soft, and the volume of the product is effectively shaped. The overall photography level is highly professional.

### 4. Originality & Creativity:

Originality is reflected in the high uniqueness of the product design itself. The creativity of photography lies in maximizing the innovation of product form and color through minimalist background and precise arrangement. This execution method of focusing on the main creativity makes the image itself have a strong visual freshness.

### 5. Theme & Communication:

The theme is clear, effectively conveying the design features, color diversity and modern style of the product, clearly showing the unique structure of each product, and high communication efficiency, allowing viewers to quickly understand the product concept and selling points.

### 6. Emotion & Viewer Response:

Color and form evoke the viewer's positive emotions, feel the fashion, vitality and fun of the product, and arouse the viewer's curiosity and interest in the product. The clean presentation method helps the viewer focus on the product itself and generate associations with home or space.

### 7. Overall Gestalt:

The overall look is very harmonious and beautiful. All elements work together to create a simple, modern and high-quality artistry. The image is very attractive and successfully conveys the aesthetic value of the product.

### 8. Comprehensive Evaluation:

The image excels in completeness, professional composition, and technical execution, effectively highlighting the product's design. The attractive color palette enhances its overall quality. While originality stems from the product design, the presentation brilliantly conveys this creativity. The theme is direct and impactful, evoking positive emotions. A high-standard work with strong commercial and aesthetic appeal.

## Medium-aesthetic Example

## 3D Design

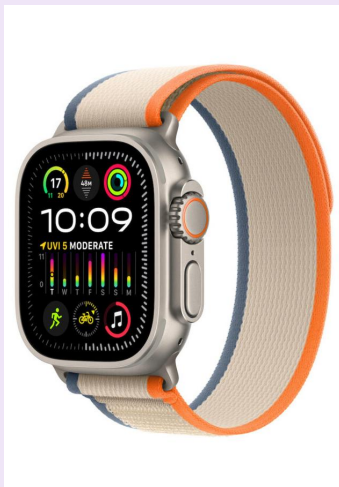

Overall Aesthetics Score: 60

### 1. Composition & Design:

The watch is positioned center-left, with the curved strap naturally guiding focus to it. The plain white background ensures clarity but results in a somewhat basic composition—balanced yet lacking creative dynamism.

### 2. Visual Elements & Structure:

The watch's metallic case sharply contrasts with its beige, orange, and blue striped strap, reflecting a vibrant, energetic aesthetic. Its clean lines, square dial with round crown, and curved strap design stand out effectively against the white background, though the composition could benefit from more depth.

### 3. Technical Execution:

In terms of the mastery of media materials, the image clearly showcases the watch, with accurate details like the strap's fabric texture and dial display. Lighting is even, exposure is correct, and textures/buttons are well-defined. While technically proficient for commercial photography, it lacks exceptional or distinctive techniques.

### 4. Originality & Creativity:

In terms of originality and creativity, this is a typical product display photo. The shooting techniques and presentation methods are relatively common, in line with industry standards, and are intended to clearly show the appearance of the product. There is no unique perspective or experimentality in the concept or execution, and the imagination is limited. It is a standardized commercial photography work.

### 5. Theme & Communication:

The theme is clear and clearly conveys the appearance and main features of the product, that is, a smart watch. The design sense of the product and the matching special strap are effectively conveyed. As a product display photo, it is not narrative or story-telling, and mainly focuses on the intuitive presentation of functions and appearance, which can effectively tell the viewer what the product looks like.

### 6. Emotion & Viewer Response:

The image focuses on product presentation rather than emotional appeal. Viewer engagement relies on interest in the watch's design and features, with lasting impact depending on brand perception. It serves primarily as functional product documentation.

### 7. Overall Gestalt:

The image is clean and well-composed, highlighting the product effectively. Its appeal lies primarily in the watch's design and colors, while the photography focuses on accurate, attractive presentation. As a commercial shot, it succeeds as a competent product display without visual distortion.

### 8. Comprehensive Evaluation:

This product shot demonstrates strong technical execution with clear, harmonious composition and on-brand color scheme. While creatively conventional, it effectively showcases the watch's details with commercial precision—clean, functional, and visually balanced.

Figure 17. High-aesthetic and medium-aesthetic example from 3D Design category.

## Low-aesthetic Example

## 3D Design

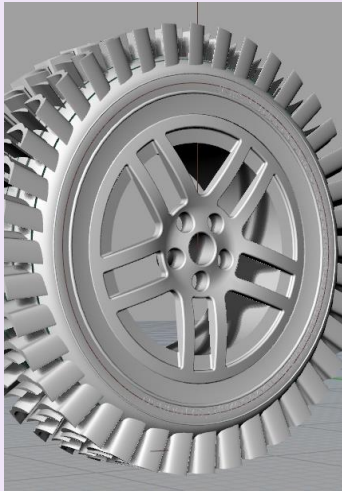

Overall Aesthetics Score: 28

### 1. Composition & Design:

The composition standard places the main tire in the center of the picture. The perspective angle can still show its structural characteristics. The overall layout is balanced, but it lacks unique visual guidance or dynamic sense.

### 2. Visual Elements & Structure:

The color is mainly grayscale, functionality is stronger than beauty, the shape and lines clearly depict the tire and its unique tread structure, the repeated lines create a visual rhythm, and the sense of space is presented through the basic 3D grid background.

### 3. Technical Execution:

In terms of the mastery of media materials, the rendering effect is relatively basic, lacking material details and advanced light and shadow performance, the detail processing needs to be strengthened, the edge jagged feeling is obvious, and the modeling grid lines of the background affect the final presentation effect.

### 4. Originality & Creativity:

The originality is mainly reflected in the unique tread design. The concept is somewhat experimental, but the overall expression is similar to the common design display method. The imagination is reflected in the alternative thinking of the tire function, but the overall creativity is limited by its nature as a design draft.

### 5. Theme & Communication:

The theme is clear, effectively conveying the design concept of the tire and its special tread, and clearly showing its morphological structure, but lacking narrative or deeper symbolic meaning.

### 6. Emotion & Viewer Response:

The emotional arousal is limited, the nature of the image is more inclined to technical and design display, and the viewer's participation may be limited to interest in the design itself, and it is difficult to produce a deep or lasting impression.

### 7. Overall Gestalt:

The overall look is closer to a design sketch or technical demonstration, lacking beauty and low artistry. The main attraction lies in its unique design concept, but the limitations of technical presentation seriously affect the overall impression.

### 8. Comprehensive Evaluation:

The completeness is average, the composition highlights the subject in a standard way, the visual elements present a unique design form but the color is monotonous, the technical execution is still in the early stages, the rendering effect is not good and affects the overall perception, the originality is reflected in the design concept rather than the form of expression, the theme is conveyed directly but lacks depth, and the emotional arousal is limited. Overall, this is a technical image that shows the design concept, and the artistry needs to be improved.

## High-aesthetic Example

## Graphic Design

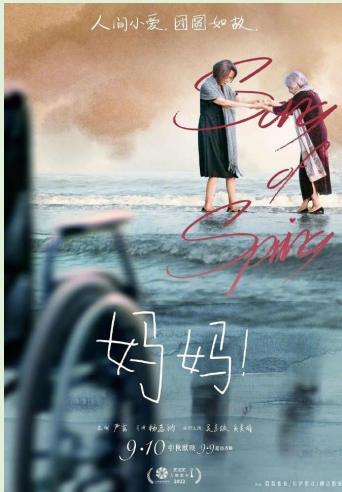

Overall Aesthetics Score: 93

### 1. Composition & Design:

The composition is balanced, with a blurred wheelchair in the foreground adding narrative depth and guiding attention to the two women supporting each other on the beach. The off-center placement of the figures, combined with the spacious background and blurred foreground, creates layered depth. Red lines enhance visual dynamism, seamlessly connecting the characters and text for a harmonious design.

### 2. Visual Elements & Structure:

The warm, emotional palette contrasts the sandy background with the blue water, while the characters' clothing harmonizes with the environment. The texture blends painterly softness with photographic realism. Smooth lines, particularly the red strokes symbolizing emotional connection, enhance the artwork's expressiveness. The thoughtful handling of form and space accentuates the scene's atmosphere.

### 3. Technical Execution:

The image demonstrates strong technical execution, with natural background blur and foreground depth of field emphasizing the main subjects. Soft lighting enhances character details, while the text integrates seamlessly for clear, unobtrusive messaging. Professionally handled with balanced contrast, it meets high standards for poster design.

### 4. Originality & Creativity:

The poster stands out with creative brilliance, blending beachside figures, blurred foreground elements, and hand-painted text/lines into a poetic, emotive visual language. The innovative red line serves as both decoration and emotional symbolism, elevating the design beyond conventional movie posters with striking artistry and distinctiveness.

### 5. Theme & Communication:

The poster powerfully conveys themes of family, love, and companionship through its central duo, seaside setting, and bold text like "Mom!" The warm tones and characters' intimate posture evoke emotional resonance, while strong visual storytelling hints at their relationship and the film's core message.

### 6. Emotion & Viewer Response:

The tender embrace and held hands between characters radiate warmth and familial love, while the foreground wheelchair adds emotional depth—hinting at themes of care, resilience, and life's bonds. Striking and evocative, the imagery lingers in memory, compelling viewers to discover the film's story.

### 7. Overall Gestalt:

The poster achieves remarkable artistic harmony, blending composition, color, and typography into a uniquely evocative aesthetic. Its emotional depth, thematic resonance, and visual polish create a compelling, authentic impression.

### 8. Comprehensive Evaluation:

This movie poster excels in composition, creativity, and emotional impact. Its balanced design, original concept, and strong thematic clarity create powerful viewer engagement. A professionally executed and highly artistic promotional piece.

Figure 18. Low-aesthetic example from 3D Design category and high-aesthetic example from Graphic Design category.

## Medium-aesthetic Example

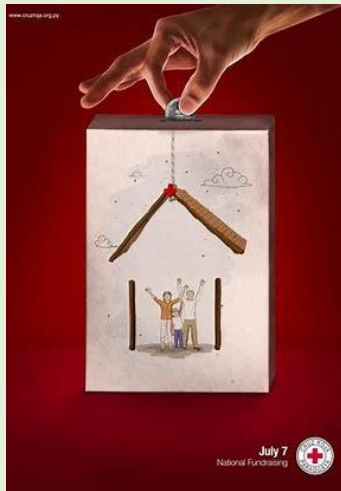

Overall Aesthetics Score: 52

## Graphic Design

### 1. Composition & Design:

The composition is standard, with the central composition highlighting the act of donating and the donation box. The layout of the elements clearly guides the eye, but the overall design lacks a more dynamic or complex sense, the background is simple, and the composition is relatively static.

### 2. Visual Elements & Structure:

The image blends realistic photography with hand-drawn illustrations, creating a contrast between literal action and symbolic meaning. A bold red background emphasizes the theme, starkly contrasting the muted donation box. Clean lines and simple shapes ensure immediate clarity, while the uncluttered composition delivers the message effectively.

### 3. Technical Execution:

In terms of technical execution, the lighting and focus of the photography part are acceptable. The style of the hand-drawn part is deliberately simple, which is in line with the theme expression. The combination of the two media is handled in a relatively basic way, lacking a sophisticated fusion or advanced post-processing technology. In terms of detail processing, the overall tendency is conceptual expression rather than realistic precision.

### 4. Originality & Creativity:

The originality is reflected in the transformation of the donation box into a symbol of home, and the relationship between donation and building a home is presented in a concrete way, with unique creativity and rich imagination.

### 5. Theme & Communication:

The image powerfully conveys donation support for families/shelter through intuitive symbols and text. It visually narrates both the act of giving and its positive impact.

### 6. Emotion & Viewer Response:

It can arouse the viewer's sympathy and positive emotions of helping others. By depicting the assisted family and its symbolic home, it effectively encourages the viewer to have emotional resonance, understand the potential value of their donation behavior, and encourage the viewer to participate.

### 7. Overall Gestalt:

The overall look is good, the creative concept is prominent and the communication is clear. The creativity of combining the donation box with the symbol of the family makes it attractive and highly functional as a public welfare promotional product. The overall presentation presents a kind of beauty that serves the theme expression. Although it is not an extreme work of art, it has good completeness and effective visual narrative. The image is not unreasonably distorted.

### 8. Comprehensive Evaluation:

The completeness is average, the composition is standard but lacks dynamics. The visual elements combine different media to form a conceptual contrast. The creativity is unique, and the abstract donation behavior is concretized into building a home. The theme is clearly conveyed and effectively, with strong narrative, which can arouse the emotional resonance of the viewer. The overall look and feel serves the purpose of publicity and has good appeal and functionality.

## Low-aesthetic Example

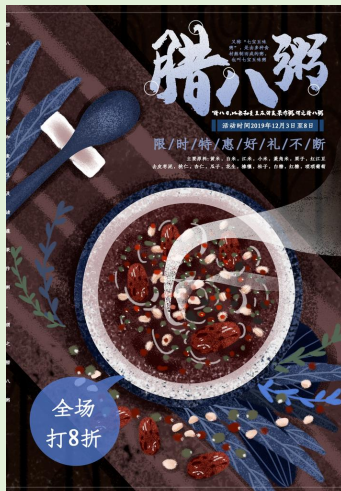

Overall Aesthetics Score: 34

## Graphic Design

### 1. Composition & Design:

The composition uses a center-down approach to highlight the porridge bowl, with oblique tableware and text to form a certain guide line. The layout is acceptable, but the density and balance between elements need to be improved, the overall feeling is a bit crowded, and there is a lack of more impactful or distinctive composition design.

### 2. Visual Elements & Structure:

The colors are mainly dark, and contrasting colors are used to attract attention. The lines and shapes have a hand-painted feel and rich textures. The form and sense of space are expressed through superposition and shadows, but the depth and layering are not prominent enough, and the visual composition is relatively plain.

### 3. Technical Execution:

The mastery of media materials is reflected in the hand-painted texture and brushstrokes, which has a certain stylization. The details such as the expression of the ingredients in the porridge are acceptable, but the overall accuracy and light and shadow effects are not fine enough, and some edge processing is slightly rough.

### 4. Originality & Creativity:

The creativity is reflected in the combination of traditional festival food and illustrations for promotion, but the form and style of expression are relatively common, lacking unique visual concepts or novel expression methods, and the innovation is mediocre.

### 5. Theme & Communication:

The theme is clear, it is about the promotion of Laba porridge. The communication mainly relies on text information. Although the visual part depicts porridge, it lacks in appeal and storytelling. The organization of visual elements fails to effectively strengthen the theme or create a stronger festive atmosphere, and the communication effect is average.

### 6. Emotion & Viewer Response:

The picture attempts to evoke the viewer's intimacy with Laba porridge, but the color and atmosphere are dark, and the emotional arousal is not strong enough. The viewer's participation is low, the picture lacks highlights that attract people's attention or produce lasting impressions, and the generation of personal meaning is also relatively limited.

### 7. Overall Gestalt:

The overall look is acceptable, with a certain hand-painted style. The beauty and artistry are limited by the composition, color and technical execution, and the appeal is insufficient. The overall visual impression is ordinary and lacks highlights.

### 8. Comprehensive Evaluation:

The completeness is average, the composition is acceptable but slightly crowded, the use of visual elements and technical execution are standard. The originality and creativity are limited, and the theme is conveyed by text. The emotional arousal and overall appeal are insufficient, and the overall visual impression is ordinary and lacks outstanding highlights.

Figure 19. Medium-aesthetic example and low-aesthetic example from *Graphic Design* category.

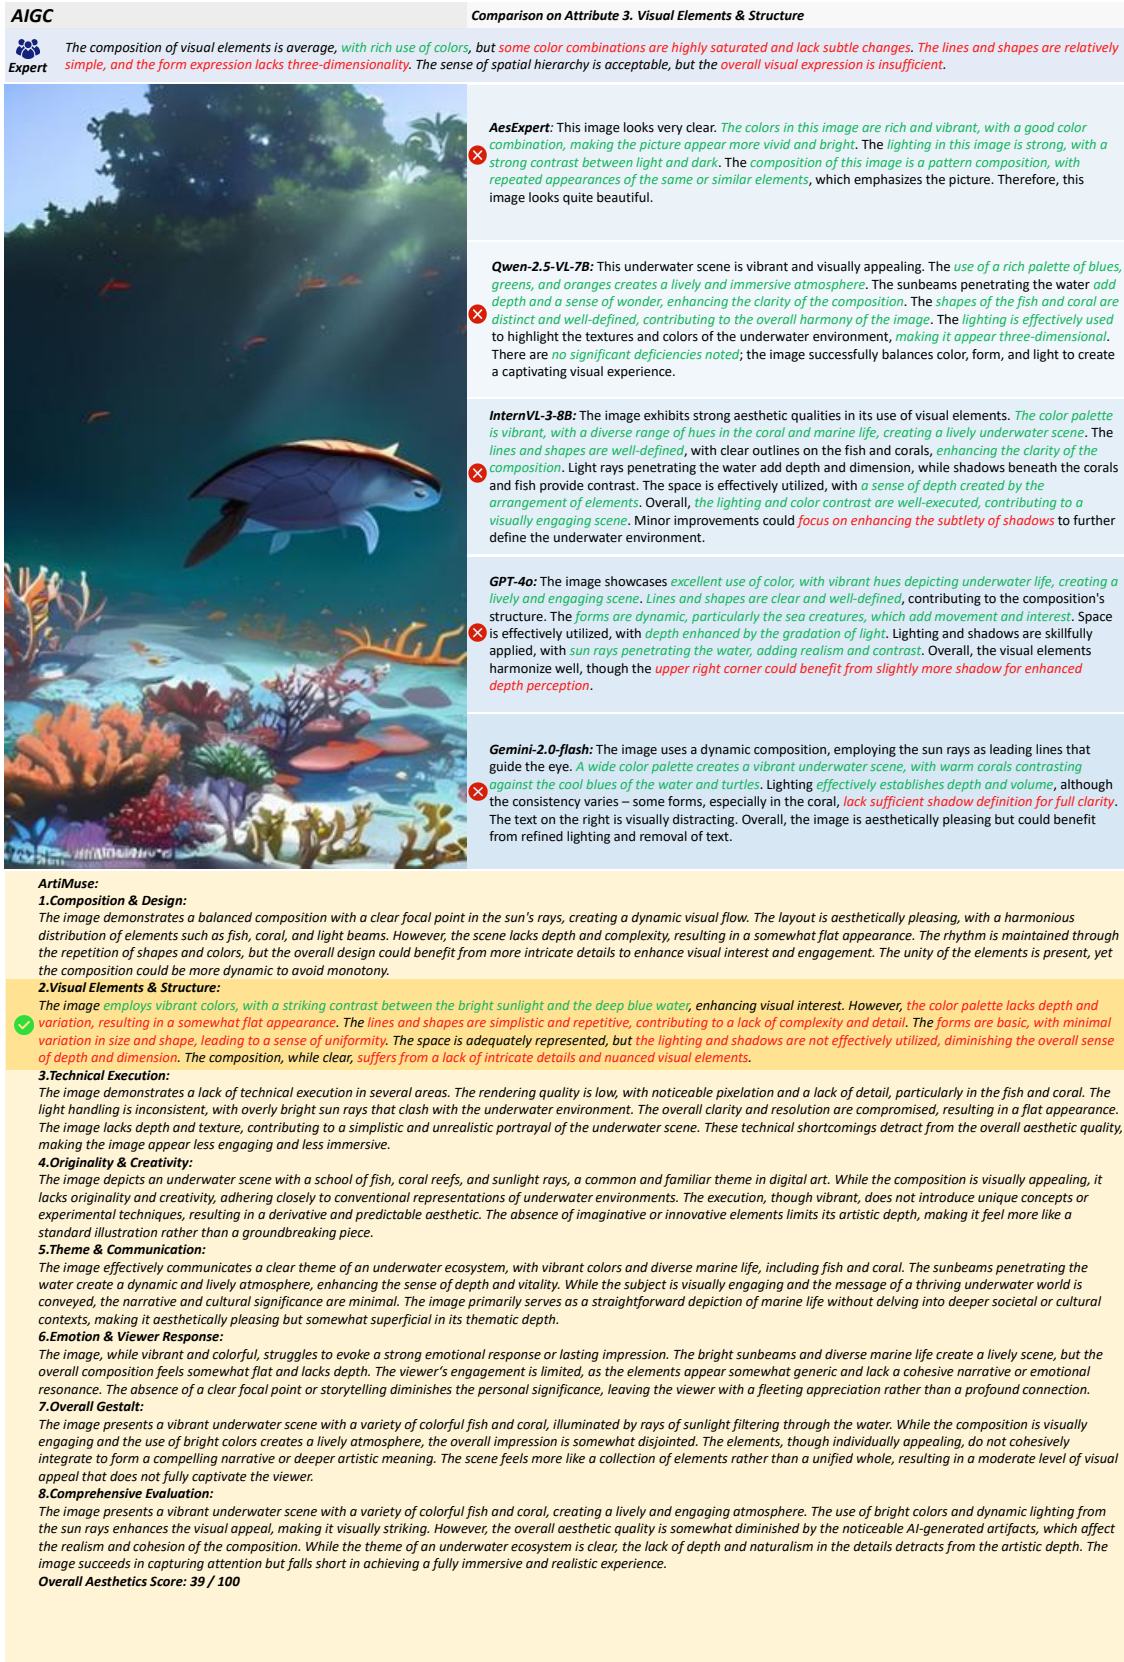

Figure 20. Structural aesthetic analysis results and comparisons on AIGC images from ArtiMuse-10K test set. Red and green denote positive and negative analyses, respectively. ArtiMuse demonstrates superior performance in identifying flaws in low-aesthetic AIGC images, achieving higher accuracy than competing models and closely aligning with expert human evaluations.

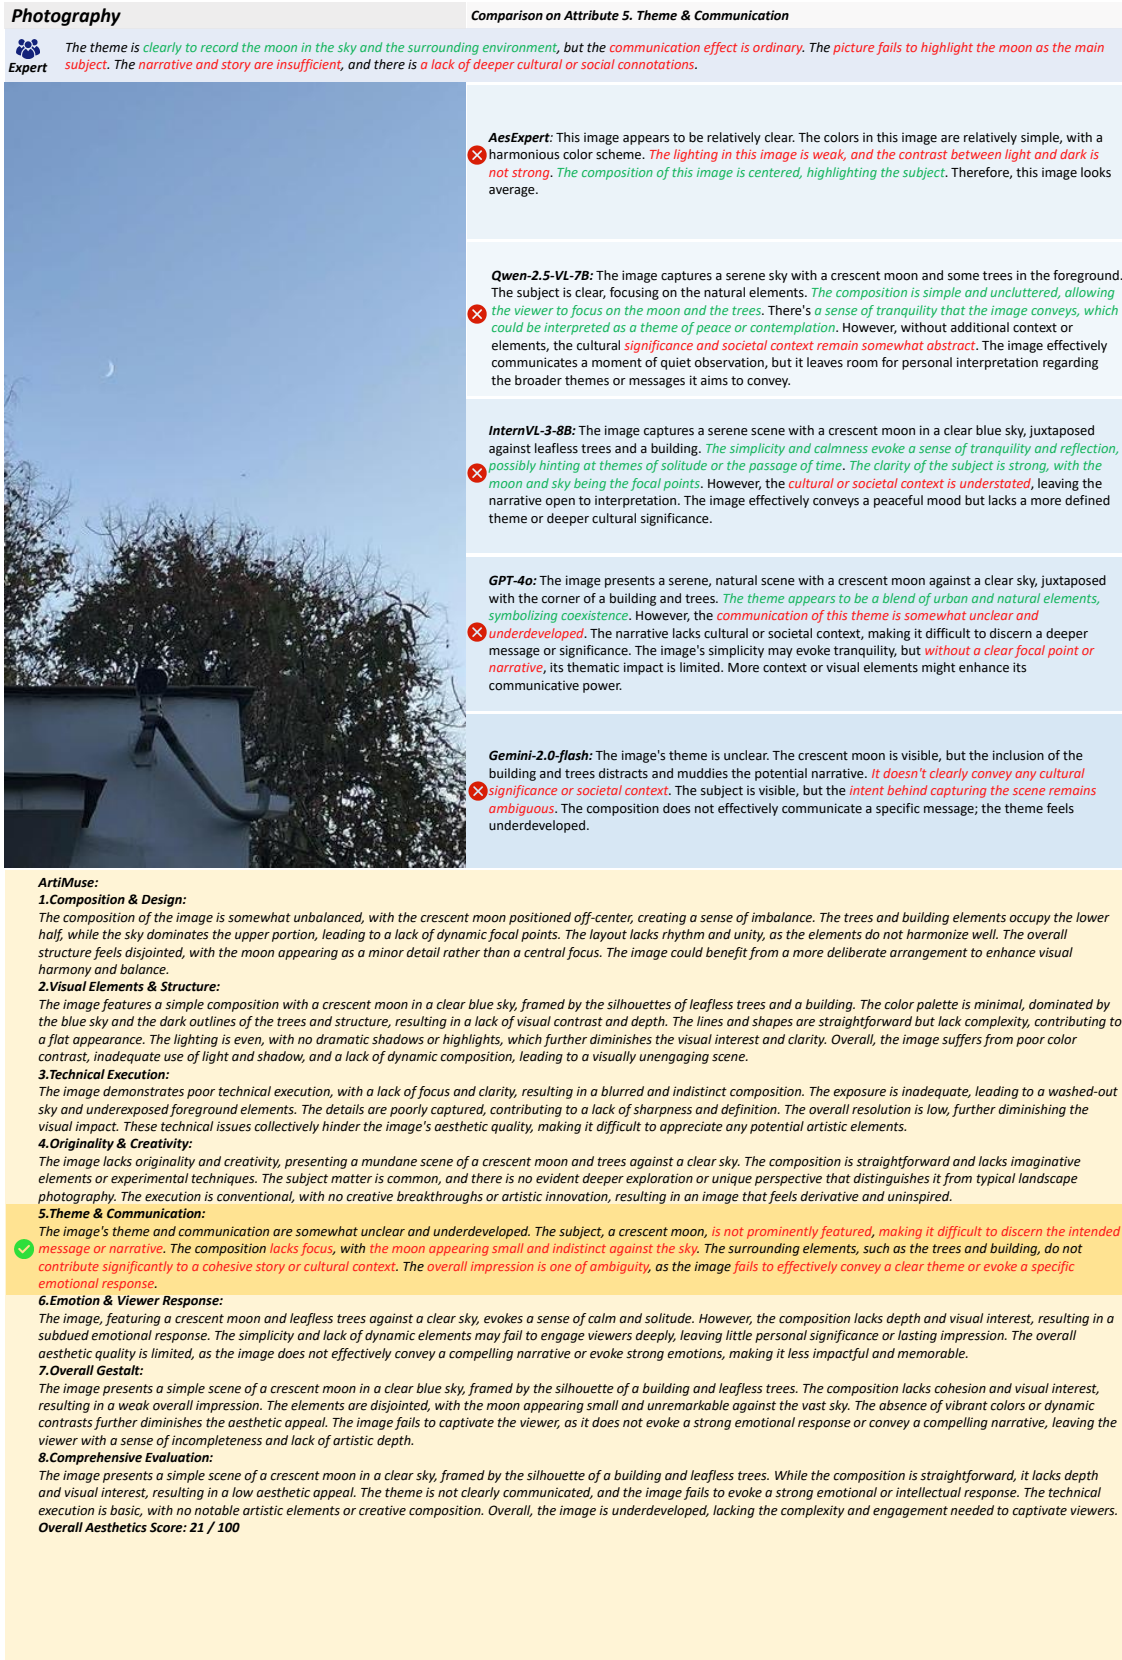

Figure 21. Structural aesthetic analysis results and comparisons on photographic images from ArtiMuse-10K test set. Red and green denote positive and negative analyses, respectively. ArtiMuse demonstrates superior performance in identifying flaws in low-aesthetic photographic images, achieving higher accuracy than competing models and closely aligning with expert human evaluations.

## Painting & Calligraphy

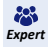

The choice of themes and combination of elements are relatively common in traditional Chinese paintings. Peonies, bright moons, and flying birds are all subjects rich in symbolic meanings. The creativity is mainly reflected in the creation of atmosphere, such as the white dots in the background, but the overall conception still follows the traditional pattern, lacking obvious new changes in brush and ink or cross-media experiments.

## Comparison on Attribute 4. Originality & Creativity

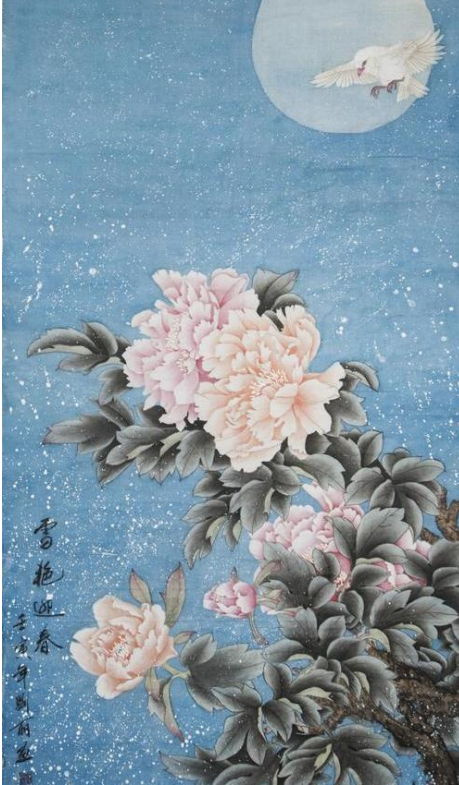

**AesExpert:** This image looks very beautiful.

**Qwen-2.5-VL-7B:** This artwork exhibits a unique blend of traditional Chinese painting techniques with a modern twist. The use of a serene blue background and the inclusion of a white dove flying towards the moon adds a sense of tranquility and depth to the composition. The delicate depiction of the peonies showcases intricate detail and vibrant colors, which stand out against the cool backdrop. While the concept is not entirely original, it successfully combines elements of nature and symbolism in a harmonious way, offering a fresh perspective on floral art. The overall execution is skillful, demonstrating a balance between tradition and innovation.

**InternVL-3-8B:** The image showcases a unique blend of traditional and contemporary elements, demonstrating creativity in its execution. The depiction of peonies against a serene, starry blue background with a moon and a flying crane introduces an imaginative fusion of nature and symbolism. The use of soft pastel colors for the flowers contrasts with the darker foliage, adding depth and visual interest. The inclusion of Chinese calligraphy enhances the cultural richness, elevating the piece beyond mere replication. While rooted in traditional motifs, the artist's experimental approach in composition and color application offers a fresh perspective, avoiding derivative qualities. Overall, it successfully merges classic themes with innovative techniques, resulting in a compelling and original artwork.

**GPT-4o:** The image showcases a traditional Chinese painting style, blending floral motifs with a serene moonlit sky. While visually pleasing, the concept feels somewhat derivative, adhering closely to established conventions of Chinese art without significant innovation or experimental approaches. The execution is skillful, yet lacks imaginative breakthroughs that would elevate it beyond common styles. The composition and elements are harmonious but do not push the boundaries of creativity, resulting in a piece that is aesthetically beautiful but not notably original in its concept or execution.

**Gemini-2.0-flash:** The image blends traditional elements with a slightly surreal atmosphere, creating a unique aesthetic. The composition of peonies and a bird against a moonlit, snow-dusted sky pushes beyond typical floral arrangements. The use of color and the sprinkling of what appears to be snow adds a distinctive, dreamy quality. While floral paintings are common, the specific combination of elements, particularly the background treatment, elevates it beyond derivative work. However, it does not represent a complete breakthrough in style.

### ArtiMuse:

#### 1. Composition & Design:

The composition of this artwork is meticulously balanced, with the large moon and blossoming branches creating a harmonious vertical rhythm. The dynamic focal points, such as the flying bird and the cascading flowers, draw the viewer's eye upward, enhancing the sense of movement and vitality. The contrast between the soft pink blossoms and the deep blue background adds visual interest, while the scattered snow-like specks introduce a subtle texture. The layout is aesthetically pleasing, with a strong sense of unity and harmony, avoiding any sense of imbalance or monotony. The overall design effectively captures the essence of traditional Chinese painting, showcasing a masterful balance of elements.

#### 2. Visual Elements & Structure:

The image showcases exceptional use of color, with a harmonious blend of soft pinks, grays, and blues that create a serene and elegant atmosphere. The lines are fluid and dynamic, effectively capturing the delicate petals and the graceful flight of the birds. The composition is balanced, with the moon and blossoms anchoring the scene. The space is well-utilized, with the blossoms and birds providing depth and movement. Lighting and shadows are subtly integrated, enhancing the three-dimensionality of the forms. Overall, the visual elements are masterfully executed, resulting in a cohesive and aesthetically pleasing composition.

#### 3. Technical Execution:

The image showcases exceptional technical execution, with precise brushstrokes that capture the delicate texture of the peonies and the intricate details of the leaves. The artist's mastery of ink and color is evident in the harmonious blending of hues, creating a lifelike representation of the flowers. The clarity and resolution are high, with no signs of blurriness or exposure issues, allowing the viewer to appreciate the fine details. The composition is balanced, with the moon and bird adding depth and movement, while the calligraphy complements the visual elements seamlessly. Overall, the technical proficiency is evident in the seamless integration of form and color, resulting in a visually captivating piece.

#### 4. Originality & Creativity:

The artwork demonstrates a high level of originality and creativity by seamlessly integrating traditional Chinese painting techniques with a modern, minimalist approach. The use of a large, luminous moon and a bird in flight introduces a dynamic element that elevates the composition beyond conventional floral and avian themes. The delicate balance of the blossoms and the subtle interplay of light and shadow showcase an imaginative interpretation of nature, blending classic motifs with a fresh perspective. This fusion of tradition and innovation reflects a deep artistic exploration, offering a unique and visually captivating experience.

#### 5. Theme & Communication:

The image effectively communicates its theme through the harmonious combination of visual elements and cultural symbolism. The blooming peonies, a symbol of prosperity and beauty, are juxtaposed with the serene moon and graceful crane, evoking a sense of tranquility and poetic beauty. The calligraphy adds depth, enhancing the narrative and cultural significance. The composition is clear, with each element contributing to a cohesive and meaningful portrayal of traditional aesthetics. The artist successfully conveys a profound cultural message, making the theme both clear and impactful.

#### 6. Emotion & Viewer Response:

The artwork masterfully evokes a profound emotional response through its harmonious blend of elements. The serene night sky, adorned with a luminous full moon and a graceful crane, creates a tranquil and contemplative atmosphere. The delicate pink peonies, symbolizing prosperity and beauty, add a touch of elegance and vitality. The calligraphy complements the visual elements, enhancing the cultural depth and inviting viewers to reflect on the beauty of nature and the passage of time. This composition successfully engages the viewer, leaving a lasting impression of peace and appreciation for the delicate interplay of life and art.

#### 7. Overall Gestalt:

The image presents a harmonious and visually captivating composition, with a strong sense of unity and balance. The delicate pink peonies, the serene blue sky, and the graceful white crane create a cohesive and aesthetically pleasing scene. The calligraphy adds an elegant touch, enhancing the overall artistic depth. The elements are well-integrated, evoking a tranquil and refined atmosphere. The combination of colors, textures, and forms effectively captures the viewer's attention, resulting in a powerful and meaningful impression that fully engages and captivates the audience.

#### 8. Comprehensive Evaluation:

The image is a masterful example of traditional Chinese painting, showcasing exceptional artistic skill and profound cultural significance. The composition is harmonious, with a delicate balance between the blossoming peonies, the serene moon, and the graceful crane, creating a tranquil and elegant atmosphere. The use of color and texture is exquisite, enhancing the visual impact and depth. The calligraphy complements the painting, adding an intellectual layer. The work effectively communicates themes of beauty, tranquility, and cultural heritage, making it a compelling and aesthetically rich piece that resonates deeply with its viewers.

**Overall Aesthetics Score: 80 / 100**

Figure 22. Structural aesthetic analysis results and comparisons on paintings from ArtiMuse-10K test set. Brown denote expert-level analyses. ArtiMuse demonstrates superior technical analysis capabilities for high-aesthetic images, exhibiting higher accuracy than competing models and achieving near-expert-level performance in aesthetic evaluation.

| Real-world Image                                                                   | Textual results of ArtiMuse                                                                                                                                                                                                                                                                                                                                                                                                                                                                                                                                                                                                                                                                                                                                                                                                                                                                                                                                                                                                                                                                                                                                                                                                                                                                                                                                                                                                                                                                                                                                                                                                                                                                                                                                                                                                                                                                                                                                                                                                                                                                                                                                                                                                                                                                                                                                                                                                                                                                                                                                                                                                                                                                                                                                                                                                                                                                                                                                                                                                                                                                                                                                                                                                                                                                                                                                                                                                                                                                                                                                                                                                                                                                                                                                                                                                                                                                                                                                                                                                                                                                                                                                                                                                                                                                                                                                                                                                                                                                                                                                                                                                                                                                                                                                                                                                                                                                                                                                                                                                                                                                                                                                                                                                                                                                                                                                                                                                                                                                                                                                                                                                                                                                                                                                                                                                                                                                     |
|------------------------------------------------------------------------------------|-------------------------------------------------------------------------------------------------------------------------------------------------------------------------------------------------------------------------------------------------------------------------------------------------------------------------------------------------------------------------------------------------------------------------------------------------------------------------------------------------------------------------------------------------------------------------------------------------------------------------------------------------------------------------------------------------------------------------------------------------------------------------------------------------------------------------------------------------------------------------------------------------------------------------------------------------------------------------------------------------------------------------------------------------------------------------------------------------------------------------------------------------------------------------------------------------------------------------------------------------------------------------------------------------------------------------------------------------------------------------------------------------------------------------------------------------------------------------------------------------------------------------------------------------------------------------------------------------------------------------------------------------------------------------------------------------------------------------------------------------------------------------------------------------------------------------------------------------------------------------------------------------------------------------------------------------------------------------------------------------------------------------------------------------------------------------------------------------------------------------------------------------------------------------------------------------------------------------------------------------------------------------------------------------------------------------------------------------------------------------------------------------------------------------------------------------------------------------------------------------------------------------------------------------------------------------------------------------------------------------------------------------------------------------------------------------------------------------------------------------------------------------------------------------------------------------------------------------------------------------------------------------------------------------------------------------------------------------------------------------------------------------------------------------------------------------------------------------------------------------------------------------------------------------------------------------------------------------------------------------------------------------------------------------------------------------------------------------------------------------------------------------------------------------------------------------------------------------------------------------------------------------------------------------------------------------------------------------------------------------------------------------------------------------------------------------------------------------------------------------------------------------------------------------------------------------------------------------------------------------------------------------------------------------------------------------------------------------------------------------------------------------------------------------------------------------------------------------------------------------------------------------------------------------------------------------------------------------------------------------------------------------------------------------------------------------------------------------------------------------------------------------------------------------------------------------------------------------------------------------------------------------------------------------------------------------------------------------------------------------------------------------------------------------------------------------------------------------------------------------------------------------------------------------------------------------------------------------------------------------------------------------------------------------------------------------------------------------------------------------------------------------------------------------------------------------------------------------------------------------------------------------------------------------------------------------------------------------------------------------------------------------------------------------------------------------------------------------------------------------------------------------------------------------------------------------------------------------------------------------------------------------------------------------------------------------------------------------------------------------------------------------------------------------------------------------------------------------------------------------------------------------------------------------------------------------------------------------------------------------------------------------|
|  | <p><b>1. Composition &amp; Design:</b><br/> <i>The composition of the image is well-balanced, with the dense cluster of white flowers and green leaves creating a harmonious and unified visual. The layout is aesthetically pleasing, with the natural arrangement of the foliage providing a sense of rhythm and flow. The contrast between the white flowers and the green leaves enhances the visual appeal, while the sharpness and brightness contribute to the overall clarity. There is no apparent lack of focus or imbalance, and the image maintains a dynamic focal point through the central concentration of flowers. The composition effectively avoids monotony, offering a rich and engaging visual experience.</i></p> <p><b>2. Visual Elements &amp; Structure:</b><br/> <i>The image showcases a lush, dense bush with small white flowers and green leaves, creating a harmonious and visually appealing composition. The use of color is effective, with the white flowers contrasting beautifully against the green foliage, enhancing the overall brightness and vibrancy. The lines and shapes are well-defined, with the flowers and leaves forming a natural, organic pattern that adds depth and texture. The lighting is soft and even, casting gentle shadows that contribute to the clarity and dimensionality of the scene. The sharpness of the image ensures that details are well-defined, making the visual elements cohesive and aesthetically pleasing.</i></p> <p><b>3. Technical Execution:</b><br/> <i>The image showcases a lush, flowering plant with a high level of detail and clarity, indicating strong technical execution. The focus is sharp, capturing the intricate details of the flowers and leaves, while the exposure is well-balanced, ensuring that the brightness and colorfulness are vibrant without being overly saturated. The contrast is effectively managed, enhancing the visual appeal of the plant. The light handling is commendable, providing a natural and inviting atmosphere. Overall, the image demonstrates a high level of technical proficiency, with no apparent issues in focus, exposure, or clarity.</i></p> <p><b>4. Originality &amp; Creativity:</b><br/> <i>The image showcases a lush, flowering plant with delicate white blossoms, presenting a serene and natural aesthetic. While the composition is visually pleasing, it leans towards a conventional representation of flora, lacking elements of originality or creativity that would set it apart from typical botanical photography. The execution is competent, capturing the plant's details and colors effectively, but it does not exhibit experimental approaches or imaginative concepts that would elevate it beyond a standard depiction. The image remains within the realm of familiar, straightforward botanical imagery, offering no deeper exploration or unique perspective.</i></p> <p><b>5. Theme &amp; Communication:</b><br/> <i>The image effectively communicates the theme of natural beauty and abundance through its depiction of a lush, flowering plant. The clarity of the subject is strong, with the white flowers and green leaves standing out against the background, drawing the viewer's attention to the plant's intricate details. The composition conveys a sense of tranquility and the vitality of nature, making the narrative of growth and renewal clear. The cultural significance of plants in representing life and beauty is subtly yet effectively conveyed, enhancing the image's aesthetic appeal. Overall, the theme is well-developed, and the message of natural elegance is communicated effectively.</i></p> <p><b>6. Emotion &amp; Viewer Response:</b><br/> <i>The image of the lush, flowering plant evokes a sense of tranquility and natural beauty, inviting viewers to appreciate the delicate intricacies of nature. The abundance of white blossoms against the green foliage creates a visually pleasing contrast, enhancing the overall aesthetic appeal. This scene can elicit feelings of calmness and serenity, encouraging a moment of reflection and connection with the natural world. The vibrant yet soothing colors and the dense, thriving plant life may leave a lasting impression, reminding viewers of the beauty and resilience of nature.</i></p> <p><b>7. Overall Gestalt:</b><br/> <i>The image presents a lush, dense cluster of white flowers and green leaves, creating a visually appealing and harmonious composition. The bright and vibrant colors, along with the sharpness and contrast, enhance the natural beauty of the plant. The overall gestalt is cohesive, with the elements blending seamlessly to evoke a sense of tranquility and freshness. The image effectively captures the delicate intricacy of the flowers and the lushness of the foliage, making it engaging and aesthetically pleasing. The balance and unity of the elements contribute to a strong, captivating impression that resonates with the viewer.</i></p> <p><b>8. Comprehensive Evaluation:</b><br/> <i>The image showcases a lush, dense bush adorned with numerous small white flowers, creating a visually appealing and harmonious composition. The vibrant green leaves contrast beautifully with the delicate blossoms, enhancing the overall aesthetic appeal. The brightness and colorfulness are well-balanced, contributing to a fresh and inviting atmosphere. While the sharpness and contrast are slightly subdued, the image effectively captures the natural beauty and tranquility of the scene. The theme of natural elegance is communicated clearly, though a bit more depth could be achieved with varied lighting or a more dynamic angle. Overall, the image is aesthetically pleasing and effectively conveys a sense of serenity.</i></p> |

Figure 23. Textual results of ArtiMuse on real-world images. Red and green denote positive and negative analyses, respectively. ArtiMuse delivers expert-level image analysis, offering accurate evaluations of both strengths and weaknesses.

| Real-world Image                                                                   | Textual results of ArtiMuse                                                                                                                                                                                                                                                                                                                                                                                                                                                                                                                                                                                                                                                                                                                                                                                                                                                                                                                                                                                                                                                                                                                                                                                                                                                                                                                                                                                                                                                                                                                                                                                                                                                                                                                                                                                                                                                                                                                                                                                                                                                                                                                                                                                                                                                                                                                                                                                                                                                                                                                                                                                                                                                                                                                                                                                                                                                                                                                                                                                                                                                                                                                                                                                                                                                                                                                                                                                                                                                                                                                                                                                                                                                                                                                                                                                                                                                                                                                                                                                                                                                                                                                                                                                                                                                                                                                                                                                                                                                                                                                                                                                                                                                                                                                                                                                                                                                                                                                                                                                                                                                                                                                                                                                                                                                                                                                                                                                                                                                                                                                                                                                                                                                                                                                                                                                                 |
|------------------------------------------------------------------------------------|-----------------------------------------------------------------------------------------------------------------------------------------------------------------------------------------------------------------------------------------------------------------------------------------------------------------------------------------------------------------------------------------------------------------------------------------------------------------------------------------------------------------------------------------------------------------------------------------------------------------------------------------------------------------------------------------------------------------------------------------------------------------------------------------------------------------------------------------------------------------------------------------------------------------------------------------------------------------------------------------------------------------------------------------------------------------------------------------------------------------------------------------------------------------------------------------------------------------------------------------------------------------------------------------------------------------------------------------------------------------------------------------------------------------------------------------------------------------------------------------------------------------------------------------------------------------------------------------------------------------------------------------------------------------------------------------------------------------------------------------------------------------------------------------------------------------------------------------------------------------------------------------------------------------------------------------------------------------------------------------------------------------------------------------------------------------------------------------------------------------------------------------------------------------------------------------------------------------------------------------------------------------------------------------------------------------------------------------------------------------------------------------------------------------------------------------------------------------------------------------------------------------------------------------------------------------------------------------------------------------------------------------------------------------------------------------------------------------------------------------------------------------------------------------------------------------------------------------------------------------------------------------------------------------------------------------------------------------------------------------------------------------------------------------------------------------------------------------------------------------------------------------------------------------------------------------------------------------------------------------------------------------------------------------------------------------------------------------------------------------------------------------------------------------------------------------------------------------------------------------------------------------------------------------------------------------------------------------------------------------------------------------------------------------------------------------------------------------------------------------------------------------------------------------------------------------------------------------------------------------------------------------------------------------------------------------------------------------------------------------------------------------------------------------------------------------------------------------------------------------------------------------------------------------------------------------------------------------------------------------------------------------------------------------------------------------------------------------------------------------------------------------------------------------------------------------------------------------------------------------------------------------------------------------------------------------------------------------------------------------------------------------------------------------------------------------------------------------------------------------------------------------------------------------------------------------------------------------------------------------------------------------------------------------------------------------------------------------------------------------------------------------------------------------------------------------------------------------------------------------------------------------------------------------------------------------------------------------------------------------------------------------------------------------------------------------------------------------------------------------------------------------------------------------------------------------------------------------------------------------------------------------------------------------------------------------------------------------------------------------------------------------------------------------------------------------------------------------------------------------------------------------------------------------------------------------------------|
|  | <p><b>1.Composition &amp; Design:</b><br/> <i>The image showcases a well-composed cityscape with a strong sense of balance and symmetry, centered around the prominent pagoda. The pathway leading to the pagoda creates a dynamic focal point, drawing the viewer's eye directly to the structure. The trees lining the path add rhythm and depth, enhancing the visual flow. The contrast between the greenery and the gray pavement, along with the soft lighting, contributes to a harmonious and aesthetically pleasing composition. The layout is unified, with the pagoda serving as the central element, while the surrounding elements complement it without overwhelming the scene. Overall, the image achieves a balanced and visually engaging composition.</i></p> <p><b>2.Visual Elements &amp; Structure:</b><br/> <i>The image effectively utilizes visual elements to create a harmonious and aesthetically pleasing composition. The symmetrical arrangement of trees lining the pathway leads the viewer's eye towards the central pagoda, enhancing depth and perspective. The use of color is balanced, with the green foliage contrasting against the gray pavement and the vibrant pagoda. Lighting is soft, casting gentle shadows that add dimension without overwhelming the scene. The clear lines and shapes contribute to a sense of order and clarity, while the open sky provides a serene backdrop. Overall, the image achieves a strong visual impact through its thoughtful use of color, light, and form.</i></p> <p><b>3.Technical Execution:</b><br/> <i>The image demonstrates strong technical execution, with a well-balanced composition that draws the viewer's eye towards the pagoda in the background. The focus is sharp, capturing the details of the trees and the pathway leading to the pagoda. The exposure is well-handled, providing a clear and bright image without overexposure or harsh shadows. The light is managed effectively, enhancing the natural colors and creating a serene atmosphere. The clarity and resolution are high, ensuring that the image is crisp and detailed. Overall, the technical aspects are well-executed, contributing to the image's aesthetic appeal.</i></p> <p><b>4.Originality &amp; Creativity:</b><br/> <i>The image showcases a striking perspective of a traditional pagoda framed by a symmetrical avenue of trees, creating a visually appealing composition. The use of leading lines and the central placement of the pagoda evoke a sense of depth and balance, enhancing the aesthetic appeal. While the concept of capturing a scenic view is common, the execution here stands out due to the clear, symmetrical arrangement and the harmonious blend of natural and architectural elements. The image successfully combines traditional and modern elements, offering a fresh perspective that elevates its originality and creativity.</i></p> <p><b>5.Theme &amp; Communication:</b><br/> <i>The image effectively communicates a serene and harmonious urban landscape, with the pagoda serving as a focal point that draws the viewer's eye along the symmetrical pathway. The composition highlights the cultural significance of the pagoda, blending traditional architecture with modern urban planning. The clear, balanced layout and the presence of people add a sense of scale and liveliness, enhancing the narrative of a peaceful city environment. The image successfully conveys a sense of tranquility and cultural heritage, making the theme of urban integration with historical elements clear and engaging.</i></p> <p><b>6.Emotion &amp; Viewer Response:</b><br/> <i>The image evokes a sense of tranquility and awe, with the towering pagoda at the end of the tree-lined pathway creating a focal point that draws the viewer's eye. The symmetry and perspective enhance the feeling of depth and grandeur, inviting contemplation and admiration. The lush greenery and clear sky contribute to a serene atmosphere, making the scene both visually appealing and emotionally engaging. This composition effectively captures the viewer's attention, leaving a lasting impression of harmony and beauty, likely resonating with those who appreciate architectural elegance and natural symmetry.</i></p> <p><b>7.Overall Gestalt:</b><br/> <i>The image presents a harmonious and aesthetically pleasing cityscape, with a striking pagoda at the end of a symmetrical, tree-lined pathway. The composition effectively uses leading lines to draw the viewer's eye towards the pagoda, creating a sense of depth and perspective. The balance between the natural elements of the trees and the man-made structures enhances the visual appeal. The lighting and color palette contribute to a serene and inviting atmosphere, while the sharpness and contrast ensure clarity and detail. Overall, the image cohesively combines these elements to create a captivating and meaningful impression, successfully engaging the viewer.</i></p> <p><b>8.Comprehensive Evaluation:</b><br/> <i>The image presents a serene and orderly cityscape, featuring a prominent pagoda at the end of a symmetrical pathway lined with trees. The composition effectively uses perspective to draw the viewer's eye towards the pagoda, creating a sense of depth and balance. The lighting and color palette are harmonious, contributing to a tranquil atmosphere. While the image is visually appealing and well-composed, it could benefit from more dynamic elements to enhance its artistic depth. The scene is clear and well-lit, but the overall impact is somewhat subdued, lacking a striking focal point or unique perspective that might elevate its aesthetic quality.</i></p> |

Figure 24. Textual results of ArtiMuse on real-world images. Brown denote expert-level analyses. ArtiMuse is capable of generating expert-level, granular assessments of visual content.

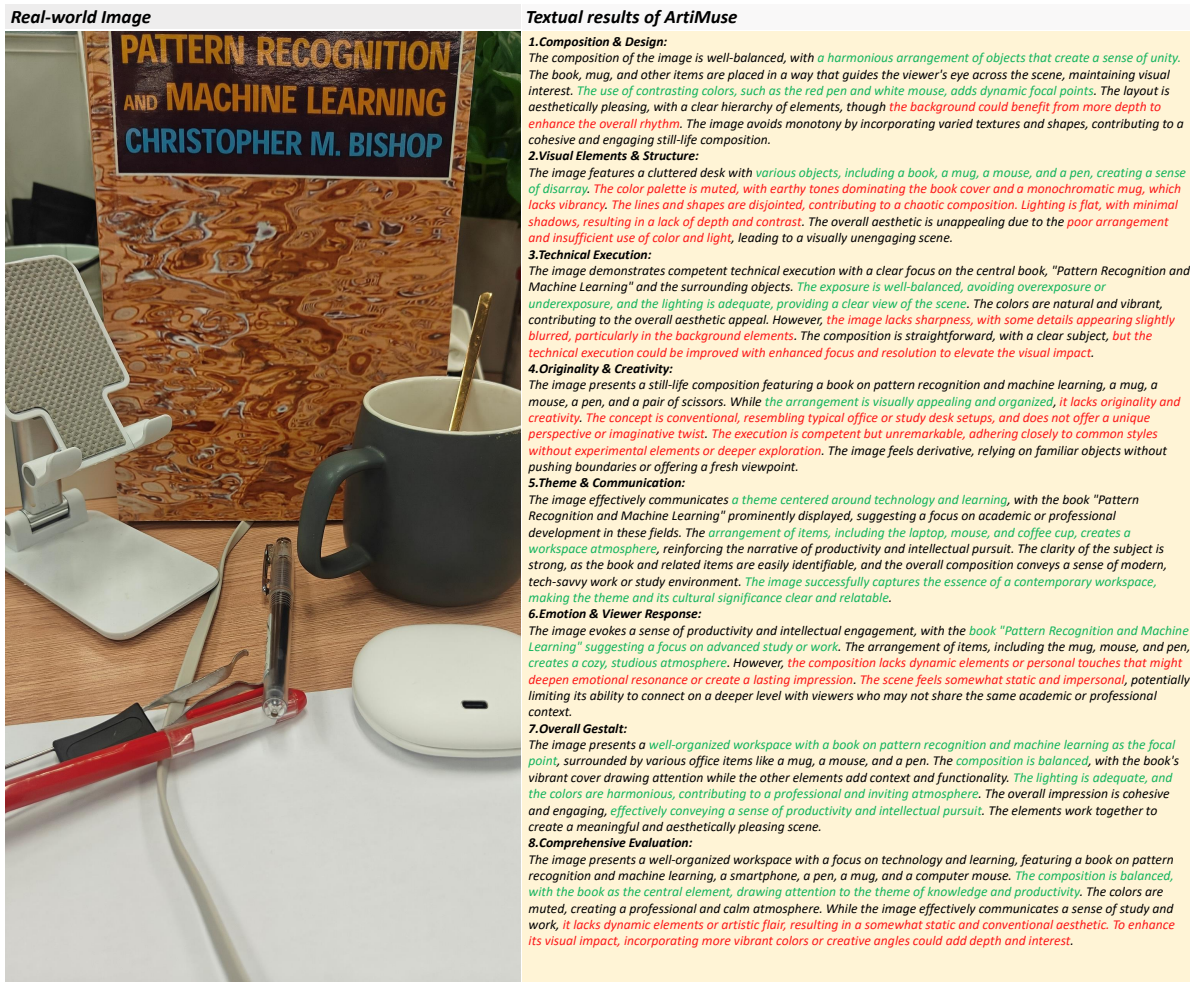

Figure 25. Textual results of ArtiMuse on real-world images. Red and green denote positive and negative analyses, respectively. ArtiMuse delivers expert-level image analysis, offering accurate evaluations of both strengths and weaknesses.

## References

- [1] Josh Achiam, Steven Adler, Sandhini Agarwal, Lama Ahmad, Ilge Akkaya, Florencia Leoni Aleman, Diogo Almeida, Janko Altenschmidt, Sam Altman, Shyamal Anadkat, et al. Gpt-4 technical report. *arXiv preprint arXiv:2303.08774*, 2023. 11
- [2] Shuai Bai, Keqin Chen, Xuejing Liu, Jialin Wang, Wenbin Ge, Sibao Song, Kai Dang, Peng Wang, Shijie Wang, Jun Tang, et al. Qwen2.5-vl technical report. *arXiv preprint arXiv:2502.13923*, 2025. 8, 11
- [3] RIR BT. Methodology for the subjective assessment of the quality of television pictures. *International Telecommunication Union*, 4:19, 2002. 7
- [4] Lin Chen, Jinsong Li, Xiaoyi Dong, Pan Zhang, Conghui He, Jiaqi Wang, Feng Zhao, and Dahua Lin. Sharegpt4v: Improving large multi-modal models with better captions. In *European Conference on Computer Vision*, pages 370–387. Springer, 2024. 8
- [5] Yuming Fang, Hanwei Zhu, Yan Zeng, Kede Ma, and Zhou Wang. Perceptual quality assessment of smartphone photography. In *IEEE Conference on Computer Vision and Pattern Recognition*, pages 3677–3686, 2020. 5
- [6] Fei Gao, Yuhao Lin, Jiaqi Shi, Maoying Qiao, and Nannan Wang. Aesmamba: Universal image aesthetic assessment with state space models. In *Proceedings of the 32nd ACM International Conference on Multimedia*, pages 7444–7453, 2024. 8
- [7] Jiawei Gu, Xuhui Jiang, Zhichao Shi, Hexiang Tan, Xuehao Zhai, Chengjin Xu, Wei Li, Yinghan Shen, Shengjie Ma, Honghao Liu, Saizhuo Wang, Kun Zhang, Yuanzhuo Wang, Wen Gao, Lionel Ni, and Jian Guo. A survey on llm-as-a-judge, 2025. 10
- [8] Shuai He, Yongchang Zhang, Rui Xie, Dongxiang Jiang, and Anlong Ming. Rethinking image aesthetics assessment: Models, datasets and benchmarks. *IJCAI*, 2022. 2, 4, 5, 8, 11
- [9] Vlad Hosu, Hanhe Lin, Tamas Sziranyi, and Dietmar Sauppe. Koniq-10k: An ecologically valid database for deep learning of blind image quality assessment. *IEEE Transactions on Image Processing*, 29:4041–4056, 2020. 5, 6
- [10] Xin Jin, Qianqian Qiao, Yi Lu, Huaye Wang, Heng Huang, Shan Gao, Jianfei Liu, and Rui Li. Apddv2: Aesthetics of paintings and drawings dataset with artist labeled scores and comments, 2024. 5
- [11] Junjie Ke, Qifei Wang, Yilin Wang, Peyman Milanfar, and Feng Yang. Musiq: Multi-scale image quality transformer, 2021. 8
- [12] Julia Kruk, Caleb Ziems, and Diyi Yang. Impressions: Understanding visual semiotics and aesthetic impact, 2023. 5, 6
- [13] Mingxing Li, Rui Wang, Lei Sun, Yancheng Bai, and Xi-angxiang Chu. Next token is enough: Realistic image quality and aesthetic scoring with multimodal large language model, 2025. 8
- [14] Ji Lin, Hongxu Yin, Wei Ping, Yao Lu, Pavlo Molchanov, Andrew Tao, Huizi Mao, Jan Kautz, Mohammad Shoeybi, and Song Han. Vila: On pre-training for visual language models, 2023. 8
- [15] Yen-Ting Lin and Yun-Nung Chen. Llm-eval: Unified multi-dimensional automatic evaluation for open-domain conversations with large language models, 2023. 10
- [16] Naila Murray, Luca Marchesotti, and Florent Perronnin. Ava: A large-scale database for aesthetic visual analysis. In *2012 IEEE Conference on Computer Vision and Pattern Recognition*, pages 2408–2415, 2012. 2, 4, 5, 7, 9, 11
- [17] Jian Ren, Xiaohui Shen, Zhe Lin, Radomir Mech, and David J. Foran. Personalized image aesthetics. In *The IEEE International Conference on Computer Vision (ICCV)*, 2017. 2, 4, 5, 11
- [18] Gemini Team, Rohan Anil, Sebastian Borgeaud, Jean-Baptiste Alayrac, Jiahui Yu, Radu Soricut, Johan Schalkwyk, Andrew M Dai, Anja Hauth, Katie Millican, et al. Gemini: a family of highly capable multimodal models. *arXiv preprint arXiv:2312.11805*, 2023. 11
- [19] Haoning Wu, Zicheng Zhang, Erli Zhang, Chaofeng Chen, Liang Liao, Annan Wang, Kaixin Xu, Chunyi Li, Jingwen Hou, Guangtao Zhai, Geng Xue, Wenxiu Sun, Qiong Yan, and Weisi Lin. Q-instruct: Improving low-level visual abilities for multi-modality foundation models, 2023. 8
- [20] Haoning Wu, Zicheng Zhang, Weixia Zhang, Chaofeng Chen, Liang Liao, Chunyi Li, Yixuan Gao, Annan Wang, Erli Zhang, Wenxiu Sun, Qiong Yan, Xiongkuo Min, Guangtao Zhai, and Weisi Lin. Q-align: Teaching LMMs for visual scoring via discrete text-defined levels. In *Proceedings of the 41st International Conference on Machine Learning*, pages 54015–54029. PMLR, 2024. 7, 8, 11
- [21] Yuzhe Yang, Liwu Xu, Leida Li, Nan Qie, Yaqian Li, Peng Zhang, and Yandong Guo. Personalized image aesthetics assessment with rich attributes, 2022. 2, 4, 5, 11
- [22] Qinghao Ye, Haiyang Xu, Jiabo Ye, Ming Yan, Anwen Hu, Haowei Liu, Qi Qian, Ji Zhang, Fei Huang, and Jingren Zhou. mplug-owl2: Revolutionizing multi-modal large language model with modality collaboration, 2023. 8
- [23] Zhiyuan You, Zheyuan Li, Jinjin Gu, Zhenfei Yin, Tianfan Xue, and Chao Dong. Depicting beyond scores: Advancing image quality assessment through multi-modal language models. In *European Conference on Computer Vision*, 2024. 10
- [24] Jooyeol Yun and Jaegul Choo. Scaling up personalized image aesthetic assessment via task vector customization, 2024. 8
- [25] Zhaokun Zhou, Qiulin Wang, Bin Lin, Yiwei Su, Rui Chen, Xin Tao, Amin Zheng, Li Yuan, Pengfei Wan, and Di Zhang. Uniaa: A unified multi-modal image aesthetic assessment baseline and benchmark. *arXiv preprint arXiv:2404.09619*, 2024. 8
- [26] Jinguo Zhu, Weiyun Wang, Zhe Chen, Zhaoyang Liu, Shenglong Ye, Lixin Gu, Yuchen Duan, Hao Tian, Weijie Su, Jie Shao, et al. Internvl3: Exploring advanced training and test-time recipes for open-source multimodal models. *arXiv preprint arXiv:2504.10479*, 2025. 8, 11
